# Supplementary material for: Registry study of immune-related adverse events using electronic patient-reported outcome in patients with cancer receiving immune checkpoint inhibitors: protocol for a multicentre cohort study
Source: PubMed Central journal article supplement — BMJ Open. 2023 Nov 22;13(11):e073724. doi: 10.1136/bmjopen-2023-073724 (PMC10668225; doi:10.1136/bmjopen-2023-073724), 2023-11-22
Supplement: bmjopen-2023-073724.draft_revisions.pdf [file bmjopen-2023-073724.draft_revisions.pdf]

# BMJ Open

BMJ Open is committed to open peer review. As part of this commitment we make the peer review history of every article we publish publicly available.

When an article is published we post the peer reviewers' comments and the authors' responses online. We also post the versions of the paper that were used during peer review. These are the versions that the peer review comments apply to.

The versions of the paper that follow are the versions that were submitted during the peer review process. They are not the versions of record or the final published versions. They should not be cited or distributed as the published version of this manuscript.

BMJ Open is an open access journal and the full, final, typeset and author-corrected version of record of the manuscript is available on our site with no access controls, subscription charges or pay-per-view fees (<http://bmjopen.bmj.com>).

If you have any questions on BMJ Open's open peer review process please email [info.bmjopen@bmj.com](mailto:info.bmjopen@bmj.com)

# BMJ Open

## Registry study of immune-related adverse events using electronic patient-reported outcome in patients with cancer receiving immune checkpoint inhibitors: protocol for a multicenter cohort study

|                               |                                                                                                                                                                                                                                                                                                                                                                                                                                                                                                                                                                                                                                                                                                                                                                                                                                                                                                                                                                                                                                                                                                                                                                                                                                                  |
|-------------------------------|--------------------------------------------------------------------------------------------------------------------------------------------------------------------------------------------------------------------------------------------------------------------------------------------------------------------------------------------------------------------------------------------------------------------------------------------------------------------------------------------------------------------------------------------------------------------------------------------------------------------------------------------------------------------------------------------------------------------------------------------------------------------------------------------------------------------------------------------------------------------------------------------------------------------------------------------------------------------------------------------------------------------------------------------------------------------------------------------------------------------------------------------------------------------------------------------------------------------------------------------------|
| Journal:                      | <i>BMJ Open</i>                                                                                                                                                                                                                                                                                                                                                                                                                                                                                                                                                                                                                                                                                                                                                                                                                                                                                                                                                                                                                                                                                                                                                                                                                                  |
| Manuscript ID                 | bmjopen-2023-073724                                                                                                                                                                                                                                                                                                                                                                                                                                                                                                                                                                                                                                                                                                                                                                                                                                                                                                                                                                                                                                                                                                                                                                                                                              |
| Article Type:                 | Protocol                                                                                                                                                                                                                                                                                                                                                                                                                                                                                                                                                                                                                                                                                                                                                                                                                                                                                                                                                                                                                                                                                                                                                                                                                                         |
| Date Submitted by the Author: | 14-Mar-2023                                                                                                                                                                                                                                                                                                                                                                                                                                                                                                                                                                                                                                                                                                                                                                                                                                                                                                                                                                                                                                                                                                                                                                                                                                      |
| Complete List of Authors:     | Hirata, Taiki; Tokyo Medical University Hospital, Department of Pharmacy<br>Kawaguchi, Takashi; Tokyo Medical University Hospital, Department of Pharmacy<br>Kanako, Azuma; Tokyo Medical University Hospital, Department of Pharmacy<br>Torii, Ayako; Tokyo Medical University Hospital, Department of Pharmacy<br>Usui, Hiroaki; Kyorin University Hospital, Department of Pharmacy<br>Kim, Soan; Juntendo University Nerima Hospital, Department of Pharmacy<br>Hayama, Tatsuya; Nihon University Itabashi Hospital, Department of Pharmacy<br>Hirate, Daisuke; Teine Keijinkai Hospital, Department of Pharmacy<br>Kawahara, Yosuke; JR Tokyo General Hospital, Department of Pharmacy<br>Kumihashi, Yuki; Tokushima Red Cross Hospital, Department of Pharmacy<br>Chisaka, Tomomi; University of Miyazaki Hospital, Department of Pharmacy<br>Wako, Tetsuya; Nippon Medical School Hospital, Department of Pharmacy<br>Yoshimura, Akinobu ; Tokyo Medical University Hospital, Department of Clinical Oncology, Outpatient Chemotherapy Center<br>Miyaji, Tempei; Tohoku University Graduate School of Medicine, Division of Biostatistics<br>Yamaguchi, Takuhiro; Tohoku University Graduate School of Medicine, Division of Biostatistics |
| Keywords:                     | CHEMOTHERAPY, ONCOLOGY, Gastrointestinal tumours < ONCOLOGY, Hepatobiliary tumours < ONCOLOGY, Adverse events < THERAPEUTICS                                                                                                                                                                                                                                                                                                                                                                                                                                                                                                                                                                                                                                                                                                                                                                                                                                                                                                                                                                                                                                                                                                                     |
|                               |                                                                                                                                                                                                                                                                                                                                                                                                                                                                                                                                                                                                                                                                                                                                                                                                                                                                                                                                                                                                                                                                                                                                                                                                                                                  |

SCHOLARONE™  
Manuscripts

1  
2  
3 **Registry study of immune-related adverse events using electronic patient-reported**  
4 **outcome in patients with cancer receiving immune checkpoint inhibitors: protocol for a**  
5 **multicenter cohort study**  
6  
7  
8  
9

10  
11  
12 Taiki Hirata<sup>1</sup>, Takashi Kawaguchi<sup>2</sup>, Kanako Azuma<sup>1</sup>, Ayako Torii<sup>1</sup>, Hiroaki Usui<sup>3</sup>, Soan  
13  
14 Kim<sup>4</sup>, Tatsuya Hayama<sup>5</sup>, Daisuke Hirate<sup>6</sup>, Yosuke Kawahara<sup>7</sup>, Yuki Kumihashi<sup>8</sup>, Tomomi  
15  
16 Chisaka<sup>9</sup>, Tetsuya Wako<sup>10</sup>, Akinobu Yoshimura<sup>11</sup>, Tempei Miyaji<sup>12</sup>, Takuhiro Yamaguchi<sup>12</sup>  
17  
18  
19  
20

21  
22 <sup>1</sup>Department of Pharmacy, Tokyo Medical University Hospital, Tokyo, Japan

23  
24 <sup>2</sup>Department of Practical Pharmacy, Tokyo University of Pharmacy and Life Sciences,  
25  
26 Tokyo, Japan

27  
28 <sup>3</sup>Department of Pharmacy, Kyorin University Hospital, Tokyo, Japan

29  
30 <sup>4</sup>Department of Pharmacy, Juntendo University Nerima Hospital, Tokyo, Japan

31  
32 <sup>5</sup>Department of Pharmacy, Nihon University Itabashi Hospital, Tokyo, Japan

33  
34 <sup>6</sup>Department of Pharmacy, Teine Keijinkai Hospital, Hokkaido, Japan

35  
36 <sup>7</sup>Department of Pharmacy, JR Tokyo General Hospital, Tokyo, Japan

37  
38 <sup>8</sup>Department of Pharmacy, Tokushima Red Cross Hospital, Tokushima, Japan

39  
40 <sup>9</sup>Department of Pharmacy, University of Miyazaki Hospital, Miyazaki, Japan

41  
42 <sup>10</sup>Department of Pharmacy, Nippon Medical School Hospital, Tokyo, Japan

43  
44 <sup>11</sup>Department of Clinical Oncology, Outpatient Chemotherapy Center, Tokyo Medical  
45  
46 University Hospital, Tokyo, Japan

47  
48 <sup>12</sup>Division of Biostatistics, Tohoku University Graduate School of Medicine, Sendai, Japan  
49  
50

51  
52 **Correspondence to:** Takashi Kawaguchi

53  
54  
55  
56  
57  
58 Department of Practical Pharmacy, Tokyo University of Pharmacy and Life Sciences  
59  
60

1  
2  
3 1432-1, Horinouchi, Hachioji-city, Tokyo 192-0392, Japan  
4

5 Phone: +81-042-676-1521  
6

7 E-Mail: tkawa@toyaku.ac.jp  
8  
9

10  
11  
12 **ORCID iD**  
13

14 Taiki Hirata: <https://orcid.org/0000-0002-4485-3529>  
15  
16

17  
18  
19 **Word count:** 2876 words  
20  
21

22  
23  
24 **Keywords:** Immune checkpoint inhibitors; electronic patient-reported outcome; cancer;  
25  
26 therapy  
27  
28  
29  
30  
31  
32  
33  
34  
35  
36  
37  
38  
39  
40  
41  
42  
43  
44  
45  
46  
47  
48  
49  
50  
51  
52  
53  
54  
55  
56  
57  
58  
59  
60

## ABSTRACT

**Introduction:** The use of immune checkpoint inhibitors (ICIs) is rapidly expanding in cancer treatment. ICI has a unique safety profile, known as immune-related adverse events (irAEs). The safety profile of ICIs lacks patient experience and perspectives. This study primarily aims to obtain a database for descriptive research on the status of irAEs using the Patient-Reported Outcomes version of the Common Terminology Criteria (PRO-CTCAE) in patients with gastrointestinal cancer, lung cancer, and malignant pleural mesothelioma treated with regimens containing ICIs.

**Methods and analysis:** This is an ongoing, multicentre, observational study. Eligible patients must be aged at least 20 years and have been diagnosed with lung cancer, malignant pleural mesothelioma, or gastrointestinal cancer and plan to use ICIs. Participants will install the ePRO application and report adverse events via ePRO using PRO-CTCAE once weekly for up to 48 weeks. In addition, a registry will be established using background information obtained from medical records. The sample size is determined by one-year projection without using statistical methods. Statistical analyses will include point estimates and 95% confidence intervals for the incidence of each adverse event by cancer type and regimen at each time point.

**Ethics and dissemination:** This research will be conducted per the Declaration of Helsinki, the Ethical Guidelines for Life Science and Medical Research Involving Human Subjects issued by the Ministry of Education, Culture, Sports, Science and Technology and the Ministry of Health, Labor and Welfare, and the revised Personal Information Protection Law. The study protocol was approved by the Ethics Committee (approval ID T2021-0180) of Tokyo Medical University Hospital on October 15, 2021.

1  
2  
3 **Registration details:** The study began enrolling patients in December 2021. The target  
4  
5 enrolment is 260; as of October 2022, 141 have been enrolled, and the enrolment is scheduled  
6  
7 to end on June 30, 2023.  
8

9  
10 **Trial registration number:** UMIN000046418  
11  
12  
13  
14  
15  
16

## 17 **STRENGTHS AND LIMITATIONS OF THE STUDY**

- 19 • Insufficient information on symptom-related adverse events of regimens containing  
20 immune checkpoint inhibitors can be clarified.  
21  
22
- 23 • Multiple insights into adverse event monitoring using PRO-CTCAE via ePRO, which  
24 can collect adverse events in real-time without patient visits in Japanese clinical  
25 practice settings, can be provided.  
26  
27
- 28 • The selected items of PRO-CTCAE in this study were determined by reviewing  
29 previous literature and Japanese drug package inserts and discussed by the board-  
30 certified oncology pharmacy specialist and through patient public involvement.  
31  
32
- 33 • A limitation of this study is that patients cannot be evaluated for PRO-CTCAE items  
34 not selected by the investigator at the time of planning. Not all patient-reported safety  
35 profiles are available.  
36  
37  
38  
39  
40  
41  
42  
43  
44  
45  
46  
47  
48  
49  
50  
51  
52  
53  
54  
55  
56  
57  
58  
59  
60

## INTRODUCTION

In 2017, the number of malignant tumour (cancer) patients and deaths worldwide were 24.5 million and 9.6 million, respectively.[1] The number of cancer patients in Japan was 775,601 in 2009.[2] Cancer treatment centres on surgery, drug therapy, and radiation therapy. Recently, immunotherapy has attracted attention, and insurance coverage for immune checkpoint inhibitors (ICIs) is rapidly expanding. The following cancer types are currently covered by insurance in Japan: non-small cell lung cancer, small cell lung cancer, malignant pleural mesothelioma, oesophageal cancer, gastric cancer, colorectal cancer, hepatocellular cancer, head and neck cancer, breast cancer, cervical cancer, uterine cancer, urothelial cancer, renal cancer, melanoma, solid tumours with high microsatellite instability-high (MSI-H), tumour mutational burden-high (TMB-H), and Hodgkin's lymphoma. Among the cancers for which ICI is indicated, in which respiratory and gastrointestinal cancers are the most common, 103,715 cases were lung cancer, 122,632 gastric cancer, 116,342 colorectal cancer, 48,003 liver cancer, and 20,787 oesophagus cancer in 2009 in Japan.[2]

Adverse events in ICI treatment differ from those of conventional cytotoxic anticancer and molecular-targeted drugs in that they may present with specific autoimmune-like immune-related adverse events (irAEs).[3] Although irAEs are relatively common in the skin, gastrointestinal tract, liver, lung, and endocrine organs, they can theoretically occur anywhere in the body.[4] IrAEs can occur at any time after the start and even after the completion of ICI administration.[5] Ipilimumab is reported to cause more skin irAEs after 2–3 weeks, gastrointestinal and hepatic after 6–7 weeks, and endocrinal after 9 weeks.[6] In contrast, nivolumab is reported to cause more skin irAEs after 5 weeks; gastrointestinal, hepatic, and pulmonary after 7–8 weeks, endocrinal after 10 weeks, and renal after 15 weeks.[7] However, most irAEs were reported to occur within 6 months of prolonged treatment with nivolumab and were not cumulative.[8] Although careful monitoring is

1  
2  
3 recommended after ICI administration, there is no settled opinion on the monitoring period.  
4  
5 IrAEs should be monitored by a physician or a physician's assistant. The response varies by  
6  
7 organ, but as a general rule, the administration should be postponed or interrupted when  $\geq$   
8  
9 Grade 2 is reached; systemic corticosteroids should be considered. After starting treatment  
10  
11 with steroids, it is recommended that they be tapered off over several weeks while checking  
12  
13 for irAE recurrence and subsequently discontinued or adjusted to a low-maintenance dose.[9,  
14  
15  
16  
17 10]

18  
19 Patient-reported outcome (PRO) is defined as ‘an evaluation method in which patients  
20  
21 judge their symptoms and quality of life; the results are obtained without any intervention  
22  
23 from doctors or other parties’ by the Food and Drug Administration.[11] In recent years,  
24  
25 adverse events assessment using PROs has gained prominence in oncology. Basch et al.[12]  
26  
27 reported that adverse event assessments in providers and patients are inconsistent, with a  
28  
29 tendency for providers to underestimate them. This problem led to the development of a PRO  
30  
31 version of the Common Terminology Criteria for Adverse Events (CTCAE), PRO-CTCAE,  
32  
33 in 2008. In a randomised controlled trial, a comparison of the pro-active approach with PRO-  
34  
35 CTCAE using electronic PRO (ePRO) for adverse events with a conventional adverse event  
36  
37 evaluation showed a significant difference in health-related quality of life and overall  
38  
39 survival.[13] This study has attracted attention as a trial that will change clinical practice. The  
40  
41 results have led to the use of PRO-CTCAE in many countries, including Japan.  
42  
43  
44  
45  
46

47 Early detection and monitoring of irAEs are important, and PROs are useful.[14]  
48  
49 However, Tolstrup et al.[15] noted that the procedure for selecting PRO-CTCAE items in  
50  
51 patients receiving immunotherapy is not well established. They reported a method for  
52  
53 selecting PRO-CTCAE questions for patients with malignant melanoma receiving  
54  
55 immunotherapy. Studies of PRO-CTCAE in ICI-using patients have been reported in  
56  
57 malignant melanoma and non-small cell lung cancer.[16, 17] Based on these studies, the  
58  
59  
60



1  
2  
3 PRO-CTCAE is used as a questionnaire to evaluate irAE; however, few studies on irAE and  
4  
5 PRO-CTCAE are available.  
6

7  
8 The present study, named RESPECT (REGistry Study of immune-related adverse  
9  
10 events using electronic Patient-reported outcome in patiEnts with cancer receiving immune  
11  
12 CheckpointT inhibitors) study, aims to obtain a database for descriptive research on the status  
13  
14 of irAEs, focusing on symptom-related adverse events in patients with cancer receiving  
15  
16 regimens that include ICIs. In addition, it aims to determine the rate of symptom-related  
17  
18 adverse events at each time point in the setting in which ePRO adverse event monitoring is  
19  
20 performed.  
21  
22

## 23 24 25 26 **METHODS AND ANALYSIS**

### 27 28 **Study design**

29  
30 This is an ongoing, multicentre, longitudinal, observational study. An observational study  
31  
32 design is used to track the mode and course of irAEs, focusing on symptom-related adverse  
33  
34 events. Participants will install the ePRO application and report adverse events weekly via  
35  
36 ePRO using PRO-CTCAE. In addition, a registry will be established using background  
37  
38 information obtained from medical records; ancillary studies will be conducted on the  
39  
40 proportion of adverse event reporting by ePRO and those associated with ICIs.  
41  
42  
43  
44  
45

### 46 47 **Patient and public involvement**

48  
49 The following two patient groups were asked to cooperate in participation: Non-Profit  
50  
51 Organization Lung Cancer Patients Association One Step and General Incorporated  
52  
53 Association Esophageal Cancer Survivor's Sharing. The research plan will include the advice  
54  
55 given on PRO-CTCAE item selection, number of questions, and survey frequency. Advice  
56  
57 will also be obtained at each stage of the process leading up to the publication of the results.  
58  
59  
60

## Study setting, participants, and recruitment

Recruitment is being performed at nine hospitals in Japan. The inclusion criterion is the diagnosis of lung cancer, malignant pleural mesothelioma, or gastrointestinal cancer in patients who plan to use an ICI and give their written consent to participate in the study, over 20 years old, and with Eastern Collaborative Oncology Group Performance Status (ECOG PS) of 0–3. Patients who do not have an ePRO-eligible device, have a severe psychiatric illness or cognitive dysfunction that affects filling out the survey form, or those with a native language that is not Japanese are excluded. The study pharmacist will invite eligible patients to participate in the study at each site. After starting treatment, participants will complete weekly ePROs, an adverse events monitoring questionnaires at week 12, and treatment satisfaction questionnaires at weeks 24 and 48. Observation shall be discontinued in the following cases: (1) if the participant requests to discontinue the adverse event evaluation using ePRO, (2) when follow-up is no longer possible due to hospital transfer, (3) death during follow-up, (4) if consent is withdrawn, and (5) loss to follow-up.

## Outcome measures

Supplementary Table S1 shows the study schedule. We will use the PRO-CTCAE and the CTCAE v5.0 to assess adverse events. In addition, we will use Cancer Therapy Satisfaction Questionnaire (CTSQ) to assess treatment satisfaction.

## Adverse events

Adverse events will be assessed using CTCAE v5.0, translated by the Japan Clinical Oncology Group as Clinician-Reported Outcome (ClinRO), and PRO-CTCAE as PRO. Since its development as a common toxicity criterion in 1984, the CTCAE has been the gold

1  
2  
3 standard as ClinRO for adverse event assessment and is widely used in clinical research,  
4 particularly in the field of oncology. The CTCAE v5.0 will be recorded from the medical  
5 record each time they are assessed; items corresponding to PRO-CTCAE will be mandatory.  
6  
7  
8  
9  
10 Meanwhile, the PRO-CTCAE, developed by the National Cancer Institute in 2008, consists  
11 of 80 items from the CTCAE version 4, extracting 78 symptoms that can be subjectively  
12 assessed by the patients and has been reworded to make them easier for patients to answer.  
13  
14  
15 Each item is assessed using one or more attributes, including presence/absence, frequency,  
16 severity, and/or interference with usual or daily activities. The original version has been  
17 evaluated for validity and reliability by Dueck et al.[18] The Japanese version of PRO-  
18 CTCAE has been validated for linguistic and psychometric validity by Miyaji et al.[19] and  
19 Kawaguchi et al.[20], respectively.  
20  
21  
22  
23  
24  
25  
26  
27  
28  
29

### 30 **Treatment satisfaction**

31  
32 The CTSQ is a 16-item questionnaire developed by Pfizer to measure treatment satisfaction  
33 specifically with cancer treatment. It has three subscales, 'Expectations of Treatment',  
34 'Feelings about Side Effects', and 'Satisfaction with Therapy', which are scored from 0 to  
35 100. Higher scores indicate higher satisfaction. This questionnaire has been validated by  
36  
37  
38  
39  
40  
41  
42  
43  
44  
45  
46  
47  
48  
49  
50  
51  
52  
53  
54  
55  
56  
57  
58  
59  
60

### 56 **Sample size determination**

57  
58 The sample size was not calculated based on a statistical perspective. Considering the annual  
59 number of patients treated with ICIs at each site and the proportion of smartphone or tablet  
60 ownership for ePRO, and obtaining consent, a target enrolment number of at least 260  
patients per year was set.

### **Data collection and timeline**

The researcher will perform web registration for the participants' data using the electronic data capture (EDC) system, Viedoc 4 (Viedoc Technologies, Sweden). Participants will respond to the PROs using 3H P-Guardian (3H Clinical Trial Inc, Japan), an ePRO application, on their own device (smartphone or tablet) at 49 time points: at baseline and weeks 1–48 after initiating ICI therapy. The investigator will explain the details of this research to the patient. After obtaining patient consent, data on psychosocial background and PRO-CTCAE will be collected from the participant's electronic device. Data on demographics, medical history, and CTCAE v5.0- JCOG scores will be collected and entered into EDC and linked to baseline PRO data. An investigator will check ePRO data within the scope of daily practice and contact participants depending on the input status. They will also be asked to record treatment satisfaction at weeks 24 and 48. The investigator will then assess each participant's adverse events using CTCAE on the day of the presentation or during hospitalisation. Adverse event assessment using CTCAE and PRO-CTCAE will continue after treatment with ICI is discontinued. The study timeline is shown in Supplementary Table S1.

### **Data monitoring**

The data centre is located at the Tohoku Graduate School of Medicine (Miyagi Prefecture, Japan). To protect participants' privacy, no personally identifiable information will be entered into the EDC. Data management and central data monitoring will be performed using the EDC. Establishment of a data monitoring committee and auditing is not planned for this study. Following the data entry of this study, the fixed data will be exported and deleted from the EDC and will be stored in the research office in electronic media for at least 10 years after the principal publication.

## Harm

This is a non-interventional, non-invasive, observational study. Therefore, the burden on the participants is minimal. Participant contributions for time spent filling out questionnaires, installing applications, and communication costs for data transmission will be explained in writing and verbally in the consent explanation. Consent will be fully explained before enrolment, and participants can withdraw even while the questionnaire is being filled out.

## Statistical analysis

The primary purpose is to obtain a database for descriptive research on the actual status of irAEs, focusing on symptom-related adverse events in patients with cancer receiving regimens that include ICIs. Furthermore, we aim to determine the incidence of symptom-related adverse events at each time point in an environment where ePRO-based adverse event monitoring is conducted in daily practice. Point estimates and 95% confidence intervals of the incidence of each adverse event at each time point by cancer type and regimen will be estimated. The treatment of missing values will not be specified in advance. In addition, we will examine the association between symptom-related adverse events and the extent of pharmacist actions and summarise the ePRO completion rate using descriptive statistics as the reality of pharmacist actions for PRO-CTCAEs.

## ETHICS AND DISSEMINATION

### Research ethical approval

This research will be conducted per the Declaration of Helsinki, the Ethical Guidelines for Life Science and Medical Research Involving Human Subjects issued by the Ministry of Education, Culture, Sports, Science and Technology and the Ministry of Health, Labor and

1  
2  
3 Welfare, and the revised Personal Information Protection Law. The protocol was approved by  
4 the Ethics Committee of Tokyo Medical University Hospital (approval ID T2021-0180) on  
5  
6 October 15, 2021. The version of the protocol became 1.1 in March 2022. The protocol has  
7  
8 been reviewed by the Institutional Review Boards of the following research centres. Juntendo  
9  
10 University Nerima Hospital, JR Tokyo General Hospital, Nippon Medical School Hospital,  
11  
12 Kyorin University Hospital, Teine Keijinkai Hospital, Nihon University Itabashi Hospital,  
13  
14 University of Miyazaki Hospital and Japanese Red Cross Tokushima Hospital.  
15  
16  
17  
18  
19  
20

## 21 **Consent**

22  
23 The researchers will give the patients an informed consent form and explain the details of the  
24  
25 study before enrolment. The participant's request to withdraw consent during or after the  
26  
27 study will be accepted without any disadvantage.  
28  
29  
30

## 31 **Access to data**

32  
33 Investigators may use the EDC to review only case data collected at their site. In addition,  
34  
35 only the data administrator at the data centre has access to the case data entered from each  
36  
37 research site through the EDC.  
38  
39  
40  
41  
42  
43

## 44 **Confidentiality**

45  
46 Three types of personal information will be used in this study: medical record number, date  
47  
48 of birth, and initials, which are the minimum required for identification and inquiry of the  
49  
50 participant. In addition, the participant's medical history and social background, which fall  
51  
52 under the category of personal information requiring special consideration, will be collected.  
53  
54 The date of birth will be collected in EDC for age calculation. Participant IDs and initials will  
55  
56 be used only in the correspondence table for each institution; this correspondence table will  
57  
58  
59  
60

1  
2  
3 not be provided to anyone other than the respective institutions. Sensitive personal  
4  
5 information will be collected in the EDC for use as the study's participant background.  
6  
7 The following measures will be taken to minimise the risk of information leakage when using  
8  
9 personal information in this study. First, all data obtained will be used only for the stated  
10  
11 purpose. EDC and ePRO systems that comply with the respective laws and regulations will  
12  
13 be used. Second, each research institute will create its correspondence table, which will not  
14  
15 be shared with other third-party institutions. Third, results will be analysed and reported in a  
16  
17 non-personally identifiable format. Fourth, in other respects, the Declaration of Helsinki, the  
18  
19 Act on the Protection of Personal Information, and the 'Ethical Guidelines for Life Sciences  
20  
21 and Medical Research Involving Human Subjects' will be followed.  
22  
23  
24  
25  
26  
27

### 28 **Dissemination policy**

29  
30 The results of this study will be presented at major domestic and international conferences  
31  
32 and published in English.  
33  
34  
35  
36

### 37 **DISCUSSION**

38  
39 This study aims to obtain a database for descriptive research on the status of irAEs, focusing  
40  
41 on symptom-related adverse events. It is the first multicentre collaborative study in Japan.  
42  
43 The profile of adverse events associated with ICIs differs from that of conventional cancer  
44  
45 drugs. Their use has diversified from monotherapy to combination with cytotoxic regimens;  
46  
47 management methods are not yet established. Furthermore, few studies presently use PRO-  
48  
49 CTCAE to evaluate irAEs with ICIs. Therefore, this study will provide information on  
50  
51 symptom-related adverse events for ICI-containing regimens in Japan, which is not fully  
52  
53 available during the development phase of treatment.  
54  
55  
56  
57  
58  
59  
60

1  
2  
3 This study's database will be used to estimate the cumulative incidence of symptom-  
4 related adverse events at 3, 6, 9, and 12 months, with 2 and 3 of the PRO-CTCAE response  
5 options (from none to 0, 1, 2, 3, and 4) as onset events by carcinoma and regimen, and the  
6 cumulative incidence of symptom-related. In addition, we are considering estimating the  
7 duration of each symptom-related adverse event by defining the worsening of an adverse  
8 event from baseline as an emergence event and the duration from the emergence of the  
9 adverse event to the return to baseline as the duration of a symptom-related adverse event. As  
10 mentioned earlier, there are still many unknowns regarding the occurrence of irAEs; this  
11 study's database may provide information on trends in the occurrence of irAEs by carcinoma  
12 and regimen. We are also considering summarising the records of ePRO confirmations with  
13 descriptive statistics and examining the association between symptom-related adverse events  
14 and the degree of pharmacist action (response options) as the reality of pharmacist action for  
15 PRO-CTCAEs. This item could be more clinically relevant, leading to early detection and  
16 treatment of irAEs through pharmacist action using the PRO-CTCAE. This could shorten the  
17 duration of treatment for irAEs, avoid serious events, and allow cancer treatment progression,  
18 demonstrating the pharmacist's professional ability and providing valuable feedback to  
19 patients and the medical community.  
20  
21  
22  
23  
24  
25  
26  
27  
28  
29  
30  
31  
32  
33  
34  
35  
36  
37  
38  
39  
40  
41

42 The study protocol has some limitations. First, the study is a hypothetical,  
43 unconventional, observational study. The number of patients was not determined by  
44 statistical methods but rather based on the number of patients at participating sites. Second,  
45 the items of symptom-related adverse events in this study were determined by reviewing  
46 previous literature and Japanese drug package inserts and discussed by the investigators (four  
47 oncology pharmacists). Therefore, it is impossible to collect information on the occurrence of  
48 other symptoms. Third, participants with cognitive impairments or psychiatric disorders and  
49 those unable to operate a smartphone or tablet are excluded from participation in this study.  
50  
51  
52  
53  
54  
55  
56  
57  
58  
59  
60



1  
2  
3 Most of the excluded patients are likely to be older adults. Patients with cancer in real-world  
4  
5 practice are often older adults; age differences may be a barrier between the study and real-  
6  
7 world practice. Finally, the study did not employ an alarm function in the event of an urgent  
8  
9 irAE. Therefore, the medical community should be contacted in the event of an urgent irAE.  
10  
11

12 The RESPECT trial may provide critical information for future treatment with ICIs in  
13  
14 clinical practice by providing information on symptom-related adverse events that have not  
15  
16 been adequately obtained during the therapeutic development phase. In addition, information  
17  
18 about pharmacist actions after EDC confirmation could influence current outpatient follow-  
19  
20 up.  
21  
22

### 23 24 25 26 **Study status**

27  
28 The study began enrolling patients in December 2021. The target enrolment is 260; as of  
29  
30 October 2022, 141 participants have been enrolled. Enrolment is scheduled to end on June  
31  
32 30, 2023. The research is conducted from October 15, 2021, to March 31, 2028.  
33  
34  
35

### 36 37 38 **Acknowledgements**

39  
40 The authors thank, in advance, all the participants, investigators, and institutions that will be  
41  
42 involved in this study.  
43  
44  
45

### 46 47 48 **Authors' contributions**

49  
50 AY contributed to the study conception and is the principal investigator. KA, TH, AT, DH,  
51  
52 TF, TK, MS, and TY participated in the study's design. TF, TK, and TY played a primary  
53  
54 role in designing the data management approach. TK and TY played a primary role in  
55  
56 designing statistical analysis. TM, TM, TK, and TY will conduct data analysis and  
57  
58 interpretation. KM, AT, TH, HA, YS, AK, MM, SO, CI, MF, NS, YT, MI, NM, TK, SH, AS,  
59  
60

1  
2  
3 YK, GA, YK, MO, TN, MO, TY, NM, AS, RI, KW, KI, ST, AU, TY, SW, and DT have  
4  
5 carried out recruitment and collected the data. All authors have read and approved the final  
6  
7 manuscript and meet the criteria for authorship as established by the International Committee  
8  
9 of Medical Journals Editors.  
10  
11  
12  
13

### 14 **Funding**

15  
16 This work was supported by the Ministry of Health, Labour and Welfare (MHLW), the  
17  
18 Grant-in-Aid for Scientific Research on Administrative Measures, ‘Research Project for ICT  
19  
20 Infrastructure Development and Artificial Intelligence Implementation for Clinical Research’  
21  
22 , Evaluation of the efficacy of the Japanese version of PRO-CTCAE in actual clinical practice  
23  
24 and in clinical trials, grant number [20AC1002]–No funding has been received from specific  
25  
26 companies or organisations other than those listed above.  
27  
28  
29  
30  
31  
32

### 33 **Competing interests statement**

34  
35 None declared.  
36  
37  
38  
39

### 40 **Patient and public involvement**

41  
42 PPI was conducted per the Patient and Public Involvement (PPI) Guidebook of the National  
43  
44 Institute of Biomedical Research and Innovation (NIBIO)[22], Japan, at the research planning  
45  
46 stage. The following two patient groups were asked to cooperate in participation: NPO Lung  
47  
48 Cancer Patients Association One Step and General Incorporated Association Esophageal  
49  
50 Cancer Survivor's Sharing.  
51  
52  
53  
54  
55

### 56 **Patient consent for publication**

57  
58 Consent was obtained directly from participants.  
59  
60

**Provenance and peer review**

Not commissioned; externally peer-reviewed.

**Open access**

This is an open-access article distributed per the Creative Commons Attribution-Non-Commercial (CC BY-NC 4.0) license, which permits others to distribute, remix, adapt, build upon this work non-commercially, and license their derivative works on different terms, provided the original work is properly cited, appropriate credit is given, any changes made indicated, and the use is non-commercial. See <http://creativecommons.org/licenses/by-nc/4.0/>.

**Data Availability Statement**

The datasets used and analysed during the current study are available from the corresponding author on reasonable request.

**REFERENCES**

1. Fitzmaurice C, Abate D, Abbasi N, et al. Global, regional, and national cancer incidence, mortality, years of life lost, years lived with disability, and disability-adjusted life-years for 29 cancer groups, 1990 to 2017: a systematic analysis for the global burden of disease study. *JAMA Oncol* 2019;5:1749–68.
2. Hori M, Matsuda T, Shibata A, et al. Cancer incidence and incidence rates in Japan in 2009: a study of 32 population-based cancer registries for the Monitoring of Cancer Incidence in Japan (MCIJ) project. *Jpn J Clin Oncol* 2015;45:884–91.
3. Postow MA, Callahan MK, Wolchok JD. Immune checkpoint blockade in cancer therapy. *J Clin Oncol* 2015;33:1974–82.
4. Lemery S, Keegan P, Pazdur R. First FDA approval agnostic of cancer site - when a biomarker defines the indication. *N Engl J Med* 2017;377:1409–12.
5. Postow MA, Sidlow R, Hellmann MD. Immune-related adverse events associated with immune checkpoint blockade. *N Engl J Med* 2018;378:158–68.
6. Weber JS, Kähler KC, Hauschild A. Management of immune-related adverse events and kinetics of response with ipilimumab. *J Clin Oncol* 2012;30:2691–7.
7. Weber JS, Hodi FS, Wolchok JD, et al. Safety profile of nivolumab monotherapy: a pooled analysis of patients with advanced melanoma. *J Clin Oncol* 2017;35:785–92.
8. Topalian SL, Drake CG, Pardoll DM. Immune checkpoint blockade: a common denominator approach to cancer therapy. *Cancer Cell* 2015;27:450–61.
9. Japanese Society of Clinical Oncology. Guidelines for Cancer Immunotherapy, 2nd Edition. 2019
10. Brahmer JR, Lacchetti C, Schneider BJ, et al. Management of immune-related adverse events in patients treated with immune checkpoint inhibitor therapy:

- 1  
2  
3 American Society of Clinical Oncology Clinical Practice Guideline. *J Clin*  
4  
5 *Oncol* 2018;36:1714–68.  
6  
7  
8 11. Food and Drug Administration, Guidance for industry: patient-reported outcome  
9  
10 measures: use in medical product development to support labeling claims. *Health*  
11  
12 *Qual Life Outcomes* 2006;4:79.  
13  
14  
15 12. Basch E, Jia X, Heller G, et al. Adverse symptom event reporting by patients vs  
16  
17 clinicians: relationships with clinical outcomes. *J Natl Cancer Inst* 2009;101:1624–32.  
18  
19  
20 13. Basch E, Deal AM, Dueck AC, et al. Overall survival results of a trial assessing  
21  
22 patient-reported outcomes for symptom monitoring during routine cancer  
23  
24 treatment. *JAMA* 2017;318:197–8.  
25  
26  
27 14. Tolstrup LK, Bastholt L, Dieperink KB, et al. The use of patient-reported outcomes to  
28  
29 detect adverse events in metastatic melanoma patients receiving immunotherapy: a  
30  
31 randomized controlled pilot trial. *J Patient Rep Outcomes* 2020;4:88.  
32  
33  
34 15. Tolstrup LK, Bastholt L, Zwisler AD, et al. Selection of patient reported outcomes  
35  
36 questions reflecting symptoms for patients with metastatic melanoma receiving  
37  
38 immunotherapy. *J Patient Rep Outcomes* 2019;3:19.  
39  
40  
41 16. Mamoor M, Postow MA, Lavery JA, et al. Quality of life in long-term survivors of  
42  
43 advanced melanoma treated with checkpoint inhibitors. *J Immunother*  
44  
45 *Cancer* 2020;8:e000260.  
46  
47  
48 17. Steffen McLouth LE, Lycan TW, Levine BJ, et al. Patient-reported outcomes from  
49  
50 patients receiving immunotherapy or chemoimmunotherapy for metastatic non-small-  
51  
52 cell lung cancer in clinical practice. *Clin Lung Cancer* 2020;21:255–263.e4.  
53  
54  
55 18. Dueck AC, Mendoza TR, Mitchell SA, et al. Validity and reliability of the US  
56  
57 National Cancer Institute's Patient-Reported Outcomes Version of the Common  
58  
59  
60

1  
2  
3 Terminology Criteria for Adverse Events (PRO-CTCAE). JAMA

4  
5 Oncol 2015;1:1051–9.

6  
7  
8 19. Miyaji T, Iioka Y, Kuroda Y, et al. Japanese translation and linguistic validation of  
9  
10 the US National Cancer Institute's Patient-Reported Outcomes version of the  
11  
12 Common Terminology Criteria for Adverse Events (PRO-CTCAE). J Patient Rep  
13  
14 Outcomes 2017;1:8.

15  
16  
17 20. Kawaguchi T, Azuma K, Sano M, et al. The Japanese version of the National Cancer  
18  
19 Institute's patient-reported outcomes version of the common terminology criteria for  
20  
21 adverse events (PRO-CTCAE): psychometric validation and discordance between  
22  
23 clinician and patient assessments of adverse events. J Patient Rep Outcomes 2017;2:2.

24  
25  
26 21. Abetz L, Coombs JH, Keininger DL, et al. Development of the cancer therapy  
27  
28 satisfaction questionnaire: item generation and content validity testing. Value  
29  
30 Health 2005;8 Suppl 1:S41–53.

31  
32  
33 22. Japan Agency for Medical Research and Development [online].

34  
35 <https://www.amed.go.jp/ppi/guidebook.html>. (accessed 15 Jan 2023)

1  
2  
3  
4  
5  
6  
7  
8  
9  
10  
11  
12  
13  
14  
15  
16  
17  
18  
19  
20  
21  
22  
23  
24  
25  
26  
27  
28  
29  
30  
31  
32  
33  
34  
35  
36  
37  
38  
39  
40  
41  
42  
43  
44  
45  
46

**Supplementary Table S1.** Study timeline

| Week                     |      | 0                                | 1– | 12 | 13– | 24 | 25– | 36 | 37– | 48 | Periodic       | At          | When                       |
|--------------------------|------|----------------------------------|----|----|-----|----|-----|----|-----|----|----------------|-------------|----------------------------|
|                          |      |                                  | 11 |    | 23  |    | 35  |    | 47  |    | report<br>form | any<br>time | terminated or<br>cancelled |
| Eligibility verification | eCRF | <input type="radio"/>            |    |    |     |    |     |    |     |    |                |             |                            |
| Background               |      |                                  |    |    |     |    |     |    |     |    |                |             |                            |
| Participant Background   | eCRF | <input type="radio"/>            |    |    |     |    |     |    |     |    |                |             |                            |
| Psychosocial background  | ePRO | <input checked="" type="radio"/> |    |    |     |    |     |    |     |    |                |             |                            |
| ECOG PS                  | eCRF | <input type="radio"/>            |    |    |     |    |     |    |     |    |                |             |                            |
| Adverse events           |      |                                  |    |    |     |    |     |    |     |    |                |             |                            |

For peer review only

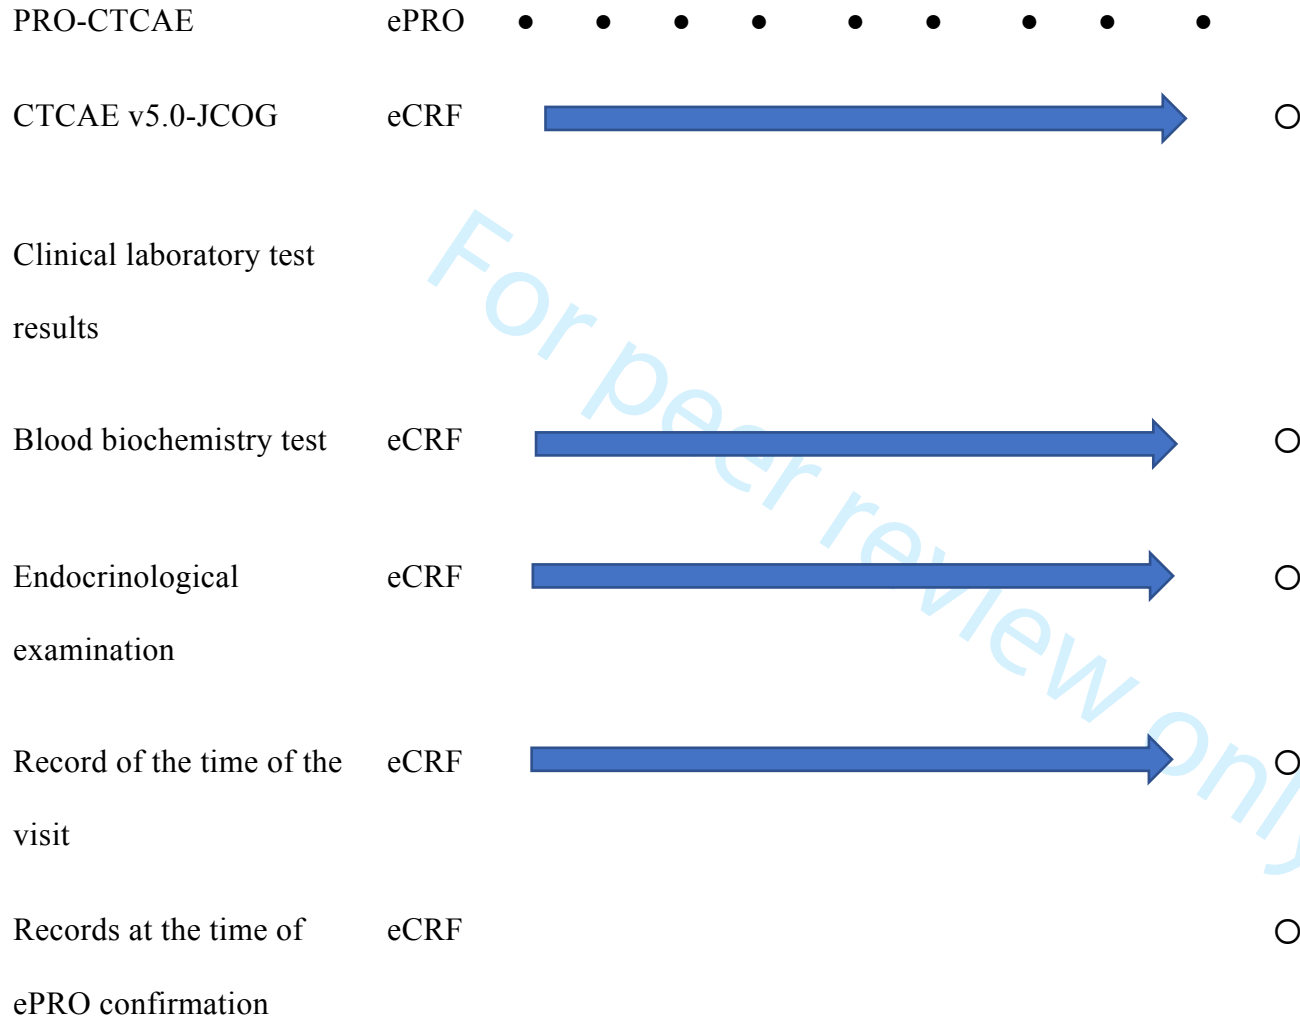

For peer review only

1  
2  
3  
4  
5  
6  
7  
8  
9  
10  
11  
12  
13  
14  
15  
16  
17  
18  
19  
20  
21  
22  
23  
24  
25  
26  
27  
28  
29  
30  
31  
32  
33  
34  
35  
36  
37  
38  
39  
40  
41  
42  
43  
44  
45  
46



|    |                         |      |      |   |   |
|----|-------------------------|------|------|---|---|
| 1  |                         |      |      |   |   |
| 2  |                         |      |      |   |   |
| 3  |                         |      |      |   |   |
| 4  | Satisfaction            | CTSQ | ePRO | ● | ● |
| 5  |                         |      |      |   |   |
| 6  |                         |      |      |   |   |
| 7  |                         |      |      |   |   |
| 8  | A questionnaire on ePRO | ePRO |      | ● |   |
| 9  | use                     |      |      |   |   |
| 10 |                         |      |      |   |   |
| 11 |                         |      |      |   |   |
| 12 |                         |      |      |   |   |
| 13 | irAE                    |      |      |   | ○ |
| 14 | (Suspected/confirmed)   |      |      |   |   |
| 15 |                         |      |      |   |   |
| 16 | Change of               |      |      |   | ○ |
| 17 | outcome/treatment       |      |      |   |   |
| 18 |                         |      |      |   |   |
| 19 |                         |      |      |   |   |
| 20 |                         |      |      |   |   |
| 21 |                         |      |      |   |   |
| 22 |                         |      |      |   |   |
| 23 |                         |      |      |   |   |
| 24 |                         |      |      |   |   |

(e)PRO, (electronic) Patient-Reported Outcome; JCOG, Japan Clinical Oncology Group; CTSQ, Cancer Therapy Satisfaction

Questionnaire; irAE, Immune-related adverse events; eCRF, Electronic case report form.

○, Medical Professionals Valuation; ●, Participant assessment.

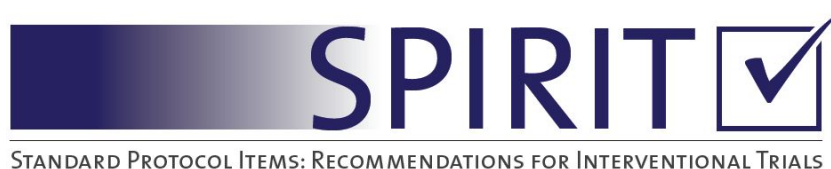

STANDARD PROTOCOL ITEMS: RECOMMENDATIONS FOR INTERVENTIONAL TRIALS

SPIRIT 2013 Checklist: Recommended items to address in a clinical trial protocol and related documents\*

| Section/item                      | Item No | Description                                                                                                                                                                                                                                                                              | Page No. |
|-----------------------------------|---------|------------------------------------------------------------------------------------------------------------------------------------------------------------------------------------------------------------------------------------------------------------------------------------------|----------|
| <b>Administrative information</b> |         |                                                                                                                                                                                                                                                                                          |          |
| Title                             | 1       | Descriptive title identifying the study design, population, interventions, and, if applicable, trial acronym                                                                                                                                                                             | 1        |
| Trial registration                | 2a      | Trial identifier and registry name. If not yet registered, name of intended registry                                                                                                                                                                                                     | 4        |
|                                   | 2b      | All items from the World Health Organization Trial Registration Data Set                                                                                                                                                                                                                 | N/A      |
| Protocol version                  | 3       | Date and version identifier                                                                                                                                                                                                                                                              |          |
| Funding                           | 4       | Sources and types of financial, material, and other support                                                                                                                                                                                                                              | 18       |
| Roles and responsibilities        | 5a      | Names, affiliations, and roles of protocol contributors                                                                                                                                                                                                                                  | 18       |
|                                   | 5b      | Name and contact information for the trial sponsor                                                                                                                                                                                                                                       | N/A      |
|                                   | 5c      | Role of study sponsor and funders, if any, in study design; collection, management, analysis, and interpretation of data; writing of the report; and the decision to submit the report for publication, including whether they will have ultimate authority over any of these activities | N/A      |
|                                   | 5d      | Composition, roles, and responsibilities of the coordinating centre, steering committee, endpoint adjudication committee, data management team, and other individuals or groups overseeing the trial, if applicable (see Item 21a for data monitoring committee)                         | N/A      |
| <b>Introduction</b>               |         |                                                                                                                                                                                                                                                                                          |          |
| Background and rationale          | 6a      | Description of research question and justification for undertaking the trial, including summary of relevant studies (published and unpublished) examining benefits and harms for each intervention                                                                                       | 5-7      |

|    |                                                           |     |                                                           |       |
|----|-----------------------------------------------------------|-----|-----------------------------------------------------------|-------|
| 1  |                                                           | 6b  | Explanation for choice of comparators                     |       |
| 2  |                                                           |     |                                                           |       |
| 3  |                                                           |     |                                                           |       |
| 4  | Objectives                                                | 7   | Specific objectives or hypotheses                         | 7     |
| 5  |                                                           |     |                                                           |       |
| 6  | Trial design                                              | 8   | Description of trial design including type of trial (eg,  | 7     |
| 7  |                                                           |     | parallel group, crossover, factorial, single group),      |       |
| 8  |                                                           |     | allocation ratio, and framework (eg, superiority,         |       |
| 9  |                                                           |     | equivalence, noninferiority, exploratory)                 |       |
| 10 |                                                           |     |                                                           |       |
| 11 |                                                           |     |                                                           |       |
| 12 | <b>Methods: Participants, interventions, and outcomes</b> |     |                                                           |       |
| 13 |                                                           |     |                                                           |       |
| 14 | Study setting                                             | 9   | Description of study settings (eg, community clinic,      | 7     |
| 15 |                                                           |     | academic hospital) and list of countries where data       |       |
| 16 |                                                           |     | will be collected. Reference to where list of study sites |       |
| 17 |                                                           |     | can be obtained                                           |       |
| 18 |                                                           |     |                                                           |       |
| 19 | Eligibility criteria                                      | 10  | Inclusion and exclusion criteria for participants. If     | 8     |
| 20 |                                                           |     | applicable, eligibility criteria for study centres and    |       |
| 21 |                                                           |     | individuals who will perform the interventions (eg,       |       |
| 22 |                                                           |     | surgeons, psychotherapists)                               |       |
| 23 |                                                           |     |                                                           |       |
| 24 |                                                           |     |                                                           |       |
| 25 | Interventions                                             | 11a | Interventions for each group with sufficient detail to    | 8-10  |
| 26 |                                                           |     | allow replication, including how and when they will be    |       |
| 27 |                                                           |     | administered                                              |       |
| 28 |                                                           |     |                                                           |       |
| 29 |                                                           |     |                                                           |       |
| 30 |                                                           | 11b | Criteria for discontinuing or modifying allocated         | 11-12 |
| 31 |                                                           |     | interventions for a given trial participant (eg, drug     |       |
| 32 |                                                           |     | dose change in response to harms, participant             |       |
| 33 |                                                           |     | request, or improving/worsening disease)                  |       |
| 34 |                                                           |     |                                                           |       |
| 35 |                                                           | 11c | Strategies to improve adherence to intervention           | N/A   |
| 36 |                                                           |     | protocols, and any procedures for monitoring              |       |
| 37 |                                                           |     | adherence (eg, drug tablet return, laboratory tests)      |       |
| 38 |                                                           |     |                                                           |       |
| 39 |                                                           |     |                                                           |       |
| 40 |                                                           | 11d | Relevant concomitant care and interventions that are      | N/A   |
| 41 |                                                           |     | permitted or prohibited during the trial                  |       |
| 42 |                                                           |     |                                                           |       |
| 43 | Outcomes                                                  | 12  | Primary, secondary, and other outcomes, including         | 8-11  |
| 44 |                                                           |     | the specific measurement variable (eg, systolic blood     |       |
| 45 |                                                           |     | pressure), analysis metric (eg, change from baseline,     |       |
| 46 |                                                           |     | final value, time to event), method of aggregation (eg,   |       |
| 47 |                                                           |     | median, proportion), and time point for each outcome.     |       |
| 48 |                                                           |     | Explanation of the clinical relevance of chosen           |       |
| 49 |                                                           |     | efficacy and harm outcomes is strongly recommended        |       |
| 50 |                                                           |     |                                                           |       |
| 51 |                                                           |     |                                                           |       |
| 52 | Participant                                               | 13  | Time schedule of enrolment, interventions (including      | 11-12 |
| 53 | timeline                                                  |     | any run-ins and washouts), assessments, and visits        |       |
| 54 |                                                           |     | for participants. A schematic diagram is highly           |       |
| 55 |                                                           |     | recommended (see Figure)                                  |       |
| 56 |                                                           |     |                                                           |       |
| 57 |                                                           |     |                                                           |       |
| 58 |                                                           |     |                                                           |       |
| 59 |                                                           |     |                                                           |       |
| 60 |                                                           |     |                                                           |       |

|   |             |    |                                                       |       |
|---|-------------|----|-------------------------------------------------------|-------|
| 1 |             |    |                                                       |       |
| 2 | Sample size | 14 | Estimated number of participants needed to achieve    | 11    |
| 3 |             |    | study objectives and how it was determined, including |       |
| 4 |             |    | clinical and statistical assumptions supporting any   |       |
| 5 |             |    | sample size calculations                              |       |
| 6 |             |    |                                                       |       |
| 7 | Recruitment | 15 | Strategies for achieving adequate participant         | 11-12 |
| 8 |             |    | enrolment to reach target sample size                 |       |
| 9 |             |    |                                                       |       |

### Methods: Assignment of interventions (for controlled trials)

#### Allocation:

|    |                |     |                                                           |     |
|----|----------------|-----|-----------------------------------------------------------|-----|
| 14 | Sequence       | 16a | Method of generating the allocation sequence (eg,         | N/A |
| 15 | generation     |     | computer-generated random numbers), and list of any       |     |
| 16 |                |     | factors for stratification. To reduce predictability of a |     |
| 17 |                |     | random sequence, details of any planned restriction       |     |
| 18 |                |     | (eg, blocking) should be provided in a separate           |     |
| 19 |                |     | document that is unavailable to those who enrol           |     |
| 20 |                |     | participants or assign interventions                      |     |
| 21 |                |     |                                                           |     |
| 22 |                |     |                                                           |     |
| 23 |                |     |                                                           |     |
| 24 | Allocation     | 16b | Mechanism of implementing the allocation sequence         | N/A |
| 25 | concealment    |     | (eg, central telephone; sequentially numbered,            |     |
| 26 | mechanism      |     | opaque, sealed envelopes), describing any steps to        |     |
| 27 |                |     | conceal the sequence until interventions are assigned     |     |
| 28 |                |     |                                                           |     |
| 29 |                |     |                                                           |     |
| 30 | Implementation | 16c | Who will generate the allocation sequence, who will       | N/A |
| 31 |                |     | enrol participants, and who will assign participants to   |     |
| 32 |                |     | interventions                                             |     |
| 33 |                |     |                                                           |     |
| 34 | Blinding       | 17a | Who will be blinded after assignment to interventions     | N/A |
| 35 | (masking)      |     | (eg, trial participants, care providers, outcome          |     |
| 36 |                |     | assessors, data analysts), and how                        |     |
| 37 |                |     |                                                           |     |
| 38 |                |     |                                                           |     |
| 39 |                | 17b | If blinded, circumstances under which unblinding is       | N/A |
| 40 |                |     | permissible, and procedure for revealing a                |     |
| 41 |                |     | participant's allocated intervention during the trial     |     |
| 42 |                |     |                                                           |     |

### Methods: Data collection, management, and analysis

|    |                 |     |                                                              |       |
|----|-----------------|-----|--------------------------------------------------------------|-------|
| 45 | Data collection | 18a | Plans for assessment and collection of outcome,              | 11-12 |
| 46 | methods         |     | baseline, and other trial data, including any related        |       |
| 47 |                 |     | processes to promote data quality (eg, duplicate             |       |
| 48 |                 |     | measurements, training of assessors) and a                   |       |
| 49 |                 |     | description of study instruments (eg, questionnaires,        |       |
| 50 |                 |     | laboratory tests) along with their reliability and validity, |       |
| 51 |                 |     | if known. Reference to where data collection forms           |       |
| 52 |                 |     | can be found, if not in the protocol                         |       |
| 53 |                 |     |                                                              |       |
| 54 |                 |     |                                                              |       |
| 55 |                 |     |                                                              |       |
| 56 |                 | 18b | Plans to promote participant retention and complete          | 11-12 |
| 57 |                 |     | follow-up, including list of any outcome data to be          |       |
| 58 |                 |     | collected for participants who discontinue or deviate        |       |
| 59 |                 |     | from intervention protocols                                  |       |
| 60 |                 |     |                                                              |       |

|    |                                 |     |                                                           |       |
|----|---------------------------------|-----|-----------------------------------------------------------|-------|
| 1  |                                 |     |                                                           |       |
| 2  | Data                            | 19  | Plans for data entry, coding, security, and storage,      | 12    |
| 3  | management                      |     | including any related processes to promote data           |       |
| 4  |                                 |     | quality (eg, double data entry; range checks for data     |       |
| 5  |                                 |     | values). Reference to where details of data               |       |
| 6  |                                 |     | management procedures can be found, if not in the         |       |
| 7  |                                 |     | protocol                                                  |       |
| 8  |                                 |     |                                                           |       |
| 9  |                                 |     |                                                           |       |
| 10 | Statistical                     | 20a | Statistical methods for analysing primary and             | 13    |
| 11 | methods                         |     | secondary outcomes. Reference to where other              |       |
| 12 |                                 |     | details of the statistical analysis plan can be found, if |       |
| 13 |                                 |     | not in the protocol                                       |       |
| 14 |                                 |     |                                                           |       |
| 15 |                                 | 20b | Methods for any additional analyses (eg, subgroup         | 13    |
| 16 |                                 |     | and adjusted analyses)                                    |       |
| 17 |                                 |     |                                                           |       |
| 18 |                                 |     |                                                           |       |
| 19 |                                 | 20c | Definition of analysis population relating to protocol    | 13    |
| 20 |                                 |     | non-adherence (eg, as randomised analysis), and any       |       |
| 21 |                                 |     | statistical methods to handle missing data (eg,           |       |
| 22 |                                 |     | multiple imputation)                                      |       |
| 23 |                                 |     |                                                           |       |
| 24 |                                 |     |                                                           |       |
| 25 | <b>Methods: Monitoring</b>      |     |                                                           |       |
| 26 | Data monitoring                 | 21a | Composition of data monitoring committee (DMC);           | 12    |
| 27 |                                 |     | summary of its role and reporting structure; statement    |       |
| 28 |                                 |     | of whether it is independent from the sponsor and         |       |
| 29 |                                 |     | competing interests; and reference to where further       |       |
| 30 |                                 |     | details about its charter can be found, if not in the     |       |
| 31 |                                 |     | protocol. Alternatively, an explanation of why a DMC      |       |
| 32 |                                 |     | is not needed                                             |       |
| 33 |                                 |     |                                                           |       |
| 34 |                                 |     |                                                           |       |
| 35 |                                 |     |                                                           |       |
| 36 |                                 | 21b | Description of any interim analyses and stopping          | 12    |
| 37 |                                 |     | guidelines, including who will have access to these       |       |
| 38 |                                 |     | interim results and make the final decision to            |       |
| 39 |                                 |     | terminate the trial                                       |       |
| 40 |                                 |     |                                                           |       |
| 41 |                                 |     |                                                           |       |
| 42 | Harms                           | 22  | Plans for collecting, assessing, reporting, and           | 12-13 |
| 43 |                                 |     | managing solicited and spontaneously reported             |       |
| 44 |                                 |     | adverse events and other unintended effects of trial      |       |
| 45 |                                 |     | interventions or trial conduct                            |       |
| 46 |                                 |     |                                                           |       |
| 47 | Auditing                        | 23  | Frequency and procedures for auditing trial conduct, if   | 12    |
| 48 |                                 |     | any, and whether the process will be independent          |       |
| 49 |                                 |     | from investigators and the sponsor                        |       |
| 50 |                                 |     |                                                           |       |
| 51 |                                 |     |                                                           |       |
| 52 | <b>Ethics and dissemination</b> |     |                                                           |       |
| 53 |                                 |     |                                                           |       |
| 54 | Research ethics                 | 24  | Plans for seeking research ethics                         | 13-14 |
| 55 | approval                        |     | committee/institutional review board (REC/IRB)            |       |
| 56 |                                 |     | approval                                                  |       |
| 57 |                                 |     |                                                           |       |
| 58 |                                 |     |                                                           |       |
| 59 |                                 |     |                                                           |       |
| 60 |                                 |     |                                                           |       |

|    |                   |     |                                                            |       |
|----|-------------------|-----|------------------------------------------------------------|-------|
| 1  |                   |     |                                                            |       |
| 2  | Protocol          | 25  | Plans for communicating important protocol                 | 14    |
| 3  | amendments        |     | modifications (eg, changes to eligibility criteria,        |       |
| 4  |                   |     | outcomes, analyses) to relevant parties (eg,               |       |
| 5  |                   |     | investigators, REC/IRBs, trial participants, trial         |       |
| 6  |                   |     | registries, journals, regulators)                          |       |
| 7  |                   |     |                                                            |       |
| 8  | Consent or        | 26a | Who will obtain informed consent or assent from            | 14    |
| 9  | assent            |     | potential trial participants or authorised surrogates,     |       |
| 10 |                   |     | and how (see Item 32)                                      |       |
| 11 |                   |     |                                                            |       |
| 12 |                   |     |                                                            |       |
| 13 |                   | 26b | Additional consent provisions for collection and use of    | 14    |
| 14 |                   |     | participant data and biological specimens in ancillary     |       |
| 15 |                   |     | studies, if applicable                                     |       |
| 16 |                   |     |                                                            |       |
| 17 | Confidentiality   | 27  | How personal information about potential and enrolled      | 14-15 |
| 18 |                   |     | participants will be collected, shared, and maintained     |       |
| 19 |                   |     | in order to protect confidentiality before, during, and    |       |
| 20 |                   |     | after the trial                                            |       |
| 21 |                   |     |                                                            |       |
| 22 |                   |     |                                                            |       |
| 23 | Declaration of    | 28  | Financial and other competing interests for principal      | 18    |
| 24 | interests         |     | investigators for the overall trial and each study site    |       |
| 25 |                   |     |                                                            |       |
| 26 | Access to data    | 29  | Statement of who will have access to the final trial       | 15    |
| 27 |                   |     | dataset, and disclosure of contractual agreements          |       |
| 28 |                   |     | that limit such access for investigators                   |       |
| 29 |                   |     |                                                            |       |
| 30 |                   |     |                                                            |       |
| 31 | Ancillary and     | 30  | Provisions, if any, for ancillary and post-trial care, and | N/A   |
| 32 | post-trial care   |     | for compensation to those who suffer harm from trial       |       |
| 33 |                   |     | participation                                              |       |
| 34 |                   |     |                                                            |       |
| 35 | Dissemination     | 31a | Plans for investigators and sponsor to communicate         | 15    |
| 36 | policy            |     | trial results to participants, healthcare professionals,   |       |
| 37 |                   |     | the public, and other relevant groups (eg, via             |       |
| 38 |                   |     | publication, reporting in results databases, or other      |       |
| 39 |                   |     | data sharing arrangements), including any publication      |       |
| 40 |                   |     | restrictions                                               |       |
| 41 |                   |     |                                                            |       |
| 42 |                   |     |                                                            |       |
| 43 |                   |     |                                                            |       |
| 44 |                   | 31b | Authorship eligibility guidelines and any intended use     | 15    |
| 45 |                   |     | of professional writers                                    |       |
| 46 |                   |     |                                                            |       |
| 47 |                   | 31c | Plans, if any, for granting public access to the full      | 15    |
| 48 |                   |     | protocol, participant-level dataset, and statistical code  |       |
| 49 |                   |     |                                                            |       |
| 50 |                   |     |                                                            |       |
| 51 | <b>Appendices</b> |     |                                                            |       |
| 52 | Informed consent  | 32  | Model consent form and other related documentation         | N/A   |
| 53 | materials         |     | given to participants and authorised surrogates            |       |
| 54 |                   |     |                                                            |       |
| 55 | Biological        | 33  | Plans for collection, laboratory evaluation, and           | N/A   |
| 56 | specimens         |     | storage of biological specimens for genetic or             |       |
| 57 |                   |     | molecular analysis in the current trial and for future     |       |
| 58 |                   |     | use in ancillary studies, if applicable                    |       |
| 59 |                   |     |                                                            |       |
| 60 |                   |     |                                                            |       |

1 \*It is strongly recommended that this checklist be read in conjunction with the SPIRIT 2013  
2 Explanation & Elaboration for important clarification on the items. Amendments to the  
3 protocol should be tracked and dated. The SPIRIT checklist is copyrighted by the SPIRIT  
4 Group under the Creative Commons "[Attribution-NonCommercial-NoDerivs 3.0 Unported](#)"  
5 license.  
6  
7  
8  
9  
10  
11  
12  
13  
14  
15  
16  
17  
18  
19  
20  
21  
22  
23  
24  
25  
26  
27  
28  
29  
30  
31  
32  
33  
34  
35  
36  
37  
38  
39  
40  
41  
42  
43  
44  
45  
46  
47  
48  
49  
50  
51  
52  
53  
54  
55  
56  
57  
58  
59  
60

For peer review only

# BMJ Open

## Registry study of immune-related adverse events using electronic patient-reported outcome in patients with cancer receiving immune checkpoint inhibitors: protocol for a multicenter cohort study

|                                 |                                                                                                                                                                                                                                                                                                                                                                                                                                                                                                                                                                                                                                                                                                                                                                                                                                                                                                                                                                                                                                                                                                                                                                                                                                                  |
|---------------------------------|--------------------------------------------------------------------------------------------------------------------------------------------------------------------------------------------------------------------------------------------------------------------------------------------------------------------------------------------------------------------------------------------------------------------------------------------------------------------------------------------------------------------------------------------------------------------------------------------------------------------------------------------------------------------------------------------------------------------------------------------------------------------------------------------------------------------------------------------------------------------------------------------------------------------------------------------------------------------------------------------------------------------------------------------------------------------------------------------------------------------------------------------------------------------------------------------------------------------------------------------------|
| Journal:                        | <i>BMJ Open</i>                                                                                                                                                                                                                                                                                                                                                                                                                                                                                                                                                                                                                                                                                                                                                                                                                                                                                                                                                                                                                                                                                                                                                                                                                                  |
| Manuscript ID                   | bmjopen-2023-073724.R1                                                                                                                                                                                                                                                                                                                                                                                                                                                                                                                                                                                                                                                                                                                                                                                                                                                                                                                                                                                                                                                                                                                                                                                                                           |
| Article Type:                   | Protocol                                                                                                                                                                                                                                                                                                                                                                                                                                                                                                                                                                                                                                                                                                                                                                                                                                                                                                                                                                                                                                                                                                                                                                                                                                         |
| Date Submitted by the Author:   | 07-Oct-2023                                                                                                                                                                                                                                                                                                                                                                                                                                                                                                                                                                                                                                                                                                                                                                                                                                                                                                                                                                                                                                                                                                                                                                                                                                      |
| Complete List of Authors:       | Hirata, Taiki; Tokyo Medical University Hospital, Department of Pharmacy<br>Kawaguchi, Takashi; Tokyo Medical University Hospital, Department of Pharmacy<br>Kanako, Azuma; Tokyo Medical University Hospital, Department of Pharmacy<br>Torii, Ayako; Tokyo Medical University Hospital, Department of Pharmacy<br>Usui, Hiroaki; Kyorin University Hospital, Department of Pharmacy<br>Kim, Soan; Juntendo University Nerima Hospital, Department of Pharmacy<br>Hayama, Tatsuya; Nihon University Itabashi Hospital, Department of Pharmacy<br>Hirate, Daisuke; Teine Keijinkai Hospital, Department of Pharmacy<br>Kawahara, Yosuke; JR Tokyo General Hospital, Department of Pharmacy<br>Kumihashi, Yuki; Tokushima Red Cross Hospital, Department of Pharmacy<br>Chisaka, Tomomi; University of Miyazaki Hospital, Department of Pharmacy<br>Wako, Tetsuya; Nippon Medical School Hospital, Department of Pharmacy<br>Yoshimura, Akinobu ; Tokyo Medical University Hospital, Department of Clinical Oncology, Outpatient Chemotherapy Center<br>Miyaji, Tempei; Tohoku University Graduate School of Medicine, Division of Biostatistics<br>Yamaguchi, Takuhiro; Tohoku University Graduate School of Medicine, Division of Biostatistics |
| <b>Primary Subject Heading</b>: | Oncology                                                                                                                                                                                                                                                                                                                                                                                                                                                                                                                                                                                                                                                                                                                                                                                                                                                                                                                                                                                                                                                                                                                                                                                                                                         |
| Secondary Subject Heading:      | Public health                                                                                                                                                                                                                                                                                                                                                                                                                                                                                                                                                                                                                                                                                                                                                                                                                                                                                                                                                                                                                                                                                                                                                                                                                                    |
| Keywords:                       | CHEMOTHERAPY, ONCOLOGY, Gastrointestinal tumours < ONCOLOGY, Hepatobiliary tumours < ONCOLOGY, Adverse events < THERAPEUTICS                                                                                                                                                                                                                                                                                                                                                                                                                                                                                                                                                                                                                                                                                                                                                                                                                                                                                                                                                                                                                                                                                                                     |
|                                 |                                                                                                                                                                                                                                                                                                                                                                                                                                                                                                                                                                                                                                                                                                                                                                                                                                                                                                                                                                                                                                                                                                                                                                                                                                                  |



1  
2  
3  
4  
5  
6  
7  
8  
9  
10  
11  
12  
13  
14  
15  
16  
17  
18  
19  
20  
21  
22  
23  
24  
25  
26  
27  
28  
29  
30  
31  
32  
33  
34  
35  
36  
37  
38  
39  
40  
41  
42  
43  
44  
45  
46  
47  
48  
49  
50  
51  
52  
53  
54  
55  
56  
57  
58  
59  
60

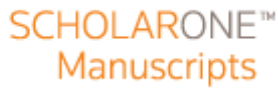

1  
2  
3 **Registry study of immune-related adverse events using electronic patient-reported**  
4 **outcome in patients with cancer receiving immune checkpoint inhibitors: protocol for a**  
5 **multicenter cohort study**  
6  
7  
8  
9

10  
11  
12 Taiki Hirata<sup>1</sup>, Takashi Kawaguchi<sup>2</sup>, Kanako Azuma<sup>1</sup>, Ayako Torii<sup>1</sup>, Hiroaki Usui<sup>3</sup>, Soan  
13 Kim<sup>4</sup>, Tatsuya Hayama<sup>5</sup>, Daisuke Hirate<sup>6</sup>, Yosuke Kawahara<sup>7</sup>, Yuki Kumihashi<sup>8</sup>, Tomomi  
14 Chisaka<sup>9</sup>, Tetsuya Wako<sup>10</sup>, Akinobu Yoshimura<sup>11</sup>, Tempei Miyaji<sup>12</sup>, Takuhiro Yamaguchi<sup>12</sup>  
15  
16  
17  
18  
19

20  
21  
22 <sup>1</sup>Department of Pharmacy, Tokyo Medical University Hospital, Tokyo, Japan

23  
24 <sup>2</sup>Department of Practical Pharmacy, Tokyo University of Pharmacy and Life Sciences,  
25  
26 Tokyo, Japan

27  
28 <sup>3</sup>Department of Pharmacy, Kyorin University Hospital, Tokyo, Japan

29  
30 <sup>4</sup>Department of Pharmacy, Juntendo University Nerima Hospital, Tokyo, Japan

31  
32 <sup>5</sup>Department of Pharmacy, Nihon University Itabashi Hospital, Tokyo, Japan

33  
34 <sup>6</sup>Department of Pharmacy, Teine Keijinkai Hospital, Hokkaido, Japan

35  
36 <sup>7</sup>Department of Pharmacy, JR Tokyo General Hospital, Tokyo, Japan

37  
38 <sup>8</sup>Department of Pharmacy, Tokushima Red Cross Hospital, Tokushima, Japan

39  
40 <sup>9</sup>Department of Pharmacy, University of Miyazaki Hospital, Miyazaki, Japan

41  
42 <sup>10</sup>Department of Pharmacy, Nippon Medical School Hospital, Tokyo, Japan

43  
44 <sup>11</sup>Department of Clinical Oncology, Outpatient Chemotherapy Center, Tokyo Medical  
45  
46 University Hospital, Tokyo, Japan

47  
48 <sup>12</sup>Division of Biostatistics, Tohoku University Graduate School of Medicine, Sendai, Japan  
49  
50

51  
52 **Correspondence to:** Takashi Kawaguchi

53  
54  
55  
56  
57  
58 Department of Practical Pharmacy, Tokyo University of Pharmacy and Life Sciences  
59  
60

1  
2  
3 1432-1, Horinouchi, Hachioji-city, Tokyo 192-0392, Japan  
4

5 Phone: +81-042-676-1521  
6

7 E-Mail: tkawa@toyaku.ac.jp  
8  
9

## 10 11 12 **ORCID iD** 13

14 Taiki Hirata: <https://orcid.org/0000-0002-4485-3529>  
15  
16

17  
18  
19 **Word count:** 4906 words  
20  
21

22  
23  
24 **Keywords:** Immune checkpoint inhibitors; electronic patient-reported outcome; cancer;  
25  
26 therapy  
27  
28

## 29 30 **ABSTRACT** 31

32  
33 **Introduction:** The use of immune checkpoint inhibitors (ICIs) is rapidly expanding in cancer  
34 treatment. ICIs have a unique safety profile, characterised by immune-related adverse events  
35 (irAEs). The safety profile of ICIs lacks patient experience and perspectives. This study  
36  
37 primarily aims to obtain a database for descriptive research on the status of irAEs using the  
38 Patient-Reported Outcomes version of the Common Terminology Criteria (PRO-CTCAE) in  
39 patients with gastrointestinal cancer, lung cancer, and malignant pleural mesothelioma treated  
40 with regimens containing ICIs.  
41  
42  
43  
44  
45  
46  
47  
48

49 **Methods and analysis:** This is an ongoing, multicentre, observational study in Japan.  
50  
51 Eligible patients must be at least 20 years and have been diagnosed with lung cancer,  
52 malignant pleural mesothelioma, or gastrointestinal cancer and plan to use ICIs. Participants  
53 will install the electronic PRO (ePRO) application and report adverse events via ePRO using  
54 PRO-CTCAE once weekly for up to 48 weeks. A registry will be established using  
55  
56  
57  
58  
59  
60

1  
2  
3 background information obtained from medical records. The sample size is determined by  
4  
5 one-year projection without using statistical methods. Statistical analyses will include point  
6  
7 estimates and 95% confidence intervals for the incidence of each adverse event by cancer  
8  
9 type and regimen at each time point.  
10  
11

12 **Ethics and dissemination:** This research will be conducted per the Declaration of Helsinki,  
13  
14 the Ethical Guidelines for Life Science and Medical Research Involving Human Subjects  
15  
16 issued by the Ministry of Education, Culture, Sports, Science and Technology and the  
17  
18 Ministry of Health, Labor and Welfare, and the revised Personal Information Protection Law.  
19  
20 The study protocol was approved by the Ethics Committee (approval ID T2021-0180) of  
21  
22 Tokyo Medical University Hospital on October 15, 2021.  
23  
24  
25

26 **Registration details:** The study began enrolling patients in December 2021. The target  
27  
28 enrolment is 260; as of October 2022, 141 have been enrolled, and the enrolment is scheduled  
29  
30 to end on June 30, 2023.  
31  
32

33 **Trial registration number:** UMIN000046418  
34  
35  
36  
37  
38  
39

## 40 **STRENGTHS AND LIMITATIONS OF THE STUDY**

41

- 42 • Insufficient information on symptom-related adverse events of regimens containing  
43 immune checkpoint inhibitors can be clarified.  
44
- 45 • Multiple insights into adverse event monitoring using PRO-CTCAE via ePRO, which  
46 can collect adverse events in real-time without patient visits in Japanese clinical  
47 practice settings, can be provided.  
48
- 49 • The selected items of PRO-CTCAE in this study were determined by reviewing  
50 previous literature and Japanese drug package inserts and discussed by a board-  
51 certified oncology pharmacy specialists and through patient public involvement.  
52  
53  
54  
55  
56  
57  
58  
59  
60

- A limitation of this study is that patients cannot be evaluated for PRO-CTCAE items not selected by the investigator at the time of planning. Not all patient-reported safety profiles are available.

## INTRODUCTION

In 2017, the number of malignant tumour (cancer) patients and deaths worldwide were 24.5 million and 9.6 million, respectively.[1] The number of cancer patients in Japan was 775,601 in 2009.[2] Cancer treatment centres on surgery, drug therapy, and radiation therapy. Recently, immunotherapy has attracted attention, and insurance coverage for immune checkpoint inhibitors (ICIs) is rapidly expanding. The following cancer types are currently covered by insurance in Japan: non-small cell lung cancer, small cell lung cancer, malignant pleural mesothelioma, oesophageal cancer, gastric cancer, colorectal cancer, hepatocellular cancer, head and neck cancer, breast cancer, cervical cancer, uterine cancer, urothelial cancer, renal cancer, melanoma, solid tumours with high microsatellite instability-high (MSI-H), tumour mutational burden-high (TMB-H), and Hodgkin's lymphoma. Among the cancers for which ICIs are indicated, in which respiratory and gastrointestinal cancers are the most common, 103,715 cases were lung cancer, 122,632 gastric cancer, 116,342 colorectal cancer, 48,003 liver cancer, and 20,787 oesophageal cancer in 2009 in Japan.[2]

Adverse events in ICI treatment differ from those of conventional cytotoxic anticancer and molecular-targeted drugs in that they may present with specific autoimmune-like immune-related adverse events (irAEs).[3] Although irAEs are relatively common in the skin, gastrointestinal tract, liver, lung, and endocrine organs, they can theoretically occur anywhere in the body.[4] IrAEs can occur at any time after the start and even after the completion of ICI administration.[5] Ipilimumab is reported to cause more skin irAEs after 2–3 weeks, gastrointestinal and hepatic after 6–7 weeks, and endocrinal after 9 weeks.[6] In

1  
2  
3 contrast, nivolumab is reported to cause more skin irAEs after 5 weeks; gastrointestinal,  
4  
5 hepatic, and pulmonary after 7–8 weeks, endocrinal after 10 weeks, and renal after 15  
6  
7 weeks.[7] However, most irAEs were reported to occur within 6 months of prolonged  
8  
9 treatment with nivolumab and were not cumulative.[8] Although careful monitoring is  
10  
11 recommended after ICI administration, there is no settled opinion on the monitoring period.  
12  
13 IrAEs should be monitored by a physician or a physician's assistant. The response varies by  
14  
15 organ, but as a general rule, the administration should be postponed or interrupted when  $\geq$   
16  
17 Grade 2 is reached; systemic corticosteroids should be considered. After starting treatment  
18  
19 with steroids, it is recommended that they be tapered off over several weeks while checking  
20  
21 for irAE recurrence and subsequently discontinued or adjusted to a low-maintenance dose.[9,  
22  
23  
24  
25  
26  
27  
28  
29  
30  
31  
32  
33  
34  
35  
36  
37  
38  
39  
40  
41  
42  
43  
44  
45  
46  
47  
48  
49  
50  
51  
52  
53  
54  
55  
56  
57  
58  
59  
60

        Patient-reported outcome (PRO) is defined as ‘an evaluation method in which patients judge their symptoms and quality of life; the results are obtained without any intervention from doctors or other parties’ by the Food and Drug Administration.[11] In recent years, adverse event assessment using PROs has gained prominence in oncology. Basch et al.[12] reported that adverse event assessments in providers and patients are inconsistent, with a tendency for providers to underestimate them. This problem led to the development of a PRO version of the Common Terminology Criteria for Adverse Events (CTCAE), PRO-CTCAE, in 2008. In a randomised controlled trial, a comparison of the pro-active approach with PRO-CTCAE using electronic PRO (ePRO) for adverse events with a conventional adverse event evaluation showed a significant difference in health-related quality of life and overall survival.[13] This study has attracted attention as a trial that will change clinical practice. The results have led to the use of PRO-CTCAE in many countries, including Japan.

        Early detection and monitoring of irAEs are important, and PROs are useful.[14] However, Tolstrup et al.[15] noted that the procedure for selecting PRO-CTCAE items in

1  
2  
3 patients receiving immunotherapy is not well established. They reported a method for  
4 selecting PRO-CTCAE questions for patients with malignant melanoma receiving  
5 immunotherapy. Studies of PRO-CTCAE in ICI-using patients have been reported in  
6 malignant melanoma and non-small cell lung cancer.[16, 17] Based on these studies, the  
7 PRO-CTCAE is used as a questionnaire to evaluate irAE; however, few studies on irAE and  
8 PRO-CTCAE are available.  
9

10  
11  
12 In Japan, pharmacists play an important role in the rapidly advancing field of cancer  
13 pharmacotherapy. Particularly, with the increase in outpatient cancer treatment, there have  
14 been many reports on the importance and usefulness of outpatient consultations conducted by  
15 pharmacists. This report suggests that in addition to routine tasks such as checking lab values  
16 and providing medication guidance, working with physicians and nurses to conduct pre- and  
17 post-consultation interviews not only benefits patients but also helps to reduce the burden on  
18 medical staff and improve the quality of care.[18, 19]  
19

20  
21  
22 The present study, named RESPECT (REGistry Study of immune-related adverse  
23 events using electronic Patient-reported outcome in patiEnts with cancer receiving immune  
24 Checkpoint inhibitors) study, aims to obtain a database for descriptive research on the status  
25 of irAEs, focusing on symptom-related adverse events in patients with cancer receiving  
26 regimens that include ICIs. In addition, it aims to determine the rate of symptom-related  
27 adverse events at each time point in the setting in which ePRO adverse event monitoring is  
28 performed.  
29

## 30 31 32 **METHODS AND ANALYSIS**

### 33 34 35 **Study design**

36  
37  
38 This is an ongoing, multicentre, longitudinal, observational study. An observational study  
39 design is used to track the mode and course of irAEs, focusing on symptom-related adverse  
40  
41  
42  
43  
44  
45  
46  
47  
48  
49  
50  
51  
52  
53  
54  
55  
56  
57  
58  
59  
60

1  
2  
3 events. Participants will install the ePRO application and report adverse events weekly via  
4  
5 ePRO using PRO-CTCAE. In addition, a registry will be established using background  
6  
7 information obtained from medical records; ancillary studies will be conducted on the  
8  
9 proportion of adverse event reporting by ePRO and those associated with ICIs.  
10  
11  
12  
13

### 14 **Patient and public involvement**

15  
16 The following two patient groups were asked to cooperate in participation: Non-Profit  
17  
18 Organization Lung Cancer Patients Association One Step and General Incorporated  
19  
20 Association Esophageal Cancer Survivor's Sharing. The research plan will include the advice  
21  
22 given on PRO-CTCAE item selection, number of questions, and survey frequency. Advice  
23  
24 will also be obtained at each stage of the process leading up to the publication of the results.  
25  
26  
27  
28  
29

### 30 **Study setting, participants, and recruitment**

31  
32 Recruitment is being performed at nine hospitals in Japan. The inclusion criterion is the  
33  
34 diagnosis of lung cancer, malignant pleural mesothelioma, or gastrointestinal cancer in  
35  
36 patients who plan to use an ICI and give their written consent to participate in the study, over  
37  
38 20 years old, and with Eastern Collaborative Oncology Group Performance Status (ECOG  
39  
40 PS) of 0–3. Patients who do not have an ePRO-eligible device, have a severe psychiatric  
41  
42 illness or cognitive dysfunction that affects filling out the survey form, or those with a native  
43  
44 language that is not Japanese are excluded. The study pharmacist will invite eligible patients  
45  
46 to participate in the study at each site. After starting treatment, participants will complete  
47  
48 weekly ePROs, an adverse events monitoring questionnaires at week 12, and treatment  
49  
50 satisfaction questionnaires at weeks 24 and 48. Observation shall be discontinued in the  
51  
52 following cases: (1) if the participant requests to discontinue the adverse event evaluation  
53  
54  
55  
56  
57  
58  
59  
60



1  
2  
3 using ePRO, (2) when follow-up is no longer possible due to hospital transfer, (3) death  
4 during follow-up, (4) if consent is withdrawn, and (5) loss to follow-up.  
5  
6  
7  
8  
9

### 10 **Outcome measures**

11  
12 Table 1 shows the study schedule. We will use the PRO-CTCAE and the CTCAE v5.0 to  
13 assess adverse events. In addition, we will use Cancer Therapy Satisfaction Questionnaire  
14 (CTSQ) to assess treatment satisfaction.  
15  
16  
17  
18  
19  
20  
21  
22  
23  
24  
25  
26  
27  
28  
29  
30  
31  
32  
33  
34  
35  
36  
37  
38  
39  
40  
41  
42  
43  
44  
45  
46  
47  
48  
49  
50  
51  
52  
53  
54  
55  
56  
57  
58  
59  
60

**Table 1.** Study timeline (summary)

| Week                                     |      | 0                                                                                    | 12 | 24 | 36 | 48 |
|------------------------------------------|------|--------------------------------------------------------------------------------------|----|----|----|----|
| Eligibility verification                 | eCRF | ○                                                                                    |    |    |    |    |
| Background                               |      |                                                                                      |    |    |    |    |
| Participant Background                   | eCRF | ○                                                                                    |    |    |    |    |
| Psychosocial background                  | ePRO | ●                                                                                    |    |    |    |    |
| ECOG PS                                  | eCRF | ○                                                                                    |    |    |    |    |
| Adverse events                           |      |                                                                                      |    |    |    |    |
| PRO-CTCAE                                | ePRO | ●                                                                                    | ●  | ●  | ●  | ●  |
| CTCAE v5.0-JCOG                          | eCRF |    |    |    |    |    |
| Laboratory data                          | eCRF |   |    |    |    |    |
| Record of the time of the visit          | eCRF |  |    |    |    |    |
| Records at the time of ePRO confirmation | eCRF |  |    |    |    |    |
| Satisfaction (CTSQ)                      | ePRO |                                                                                      |    | ●  |    | ●  |
| A questionnaire on ePRO use              | ePRO |                                                                                      | ●  |    |    |    |
| irAE (Suspected/confirmed)               |      |  |    |    |    |    |

(e)PRO, (electronic) Patient-Reported Outcome; JCOG, Japan Clinical Oncology Group;

CTSQ, Cancer Therapy Satisfaction Questionnaire; irAE, Immune-related adverse events;

eCRF, Electronic case report form.

○, Medical Professionals Valuation; ●, Participant assessment

### **Adverse events**

Adverse events will be assessed using CTCAE v5.0, translated by the Japan Clinical Oncology Group as Clinician-Reported Outcome (ClinRO), and PRO-CTCAE as PRO. Since its development as a common toxicity criterion in 1984, the CTCAE has been the gold standard as ClinRO for adverse event assessment and is widely used in clinical research, particularly in the field of oncology. The CTCAE v5.0 will be recorded from the medical record each time they are assessed; items corresponding to PRO-CTCAE will be mandatory. Meanwhile, the PRO-CTCAE, developed by the National Cancer Institute in 2008, consists of 80 items from the CTCAE version 4, extracting 78 symptoms that can be subjectively assessed by the patients and has been reworded to make them easier for patients to answer. Each item is assessed using one or more attributes, including presence/absence, frequency, severity, and/or interference with usual or daily activities. The original version has been evaluated for validity and reliability by Dueck et al.[20] The Japanese version of PRO-CTCAE has been validated for linguistic and psychometric validity by Miyaji et al.[21] and Kawaguchi et al.[22], respectively.

### **Treatment satisfaction**

The CTSQ is a 16-item questionnaire developed by Pfizer to measure treatment satisfaction specifically with cancer treatment. It has three subscales, 'Expectations of Treatment', 'Feelings about Side Effects', and 'Satisfaction with Therapy', which are scored from 0 to 100. Higher scores indicate higher satisfaction. This questionnaire has been validated by Abetz et al.[23]

### **Sample size determination**

1  
2  
3 The sample size was not calculated based on a statistical perspective. Considering the annual  
4 number of patients treated with ICIs at each site and the proportion of smartphone or tablet  
5 ownership for ePRO, and obtaining consent, a target enrolment number of at least 260  
6 patients per year was set.  
7  
8  
9  
10  
11  
12  
13

### 14 **Data collection and timeline**

15  
16 The study pharmacist will perform web registration for the participants' data using the  
17 electronic data capture (EDC) system, Viedoc 4 (Viedoc Technologies, Sweden). Participants  
18 will respond to the PROs using 3H P-Guardian (3H Clinical Trial Inc, Japan), an ePRO  
19 application, on their own device (smartphone or tablet) at 49 time points: at baseline and  
20 weeks 1–48 after initiating ICI therapy. The oncologist and/or study pharmacist will explain  
21 the details of this research to the patient. After obtaining patient consent, data on  
22 psychosocial background and PRO-CTCAE will be collected from the participant's electronic  
23 device. Data on demographics, medical history, and CTCAE v5.0- JCOG scores will be  
24 collected and entered into EDC and linked to baseline PRO data. The study pharmacist will  
25 review ePRO data within the scope of their routine daily practice and, based on this  
26 information, share information with physicians and nurses, and contact and respond to  
27 participants, but there are no restrictions or interventions since this is for research study  
28 purposes. After the study pharmacist has reviewed the ePRO data, they will record in the EDC  
29 whether they have contacted the physician, nurse, or patient, and if so, the details of that  
30 action. They will also be asked to record treatment satisfaction at weeks 24 and 48. Adverse  
31 event assessment using CTCAE and PRO-CTCAE will continue after treatment with ICIs is  
32 discontinued. The study timeline is shown in Table 1.  
33  
34  
35  
36  
37  
38  
39  
40  
41  
42  
43  
44  
45  
46  
47  
48  
49  
50  
51  
52  
53  
54  
55  
56  
57

### 58 **Data monitoring**

1  
2  
3 The data centre is located at the Tohoku Graduate School of Medicine (Miyagi Prefecture,  
4 Japan). To protect participants' privacy, no personally identifiable information will be  
5 entered into the EDC. Data management and central data monitoring will be performed using  
6 the EDC. Establishment of a data monitoring committee and auditing are not planned for this  
7 study. Following the data entry of this study, the fixed data will be exported and deleted from  
8 the EDC and will be stored in the research office in electronic media for at least 10 years after  
9 the principal publication.  
10  
11  
12  
13  
14  
15  
16  
17  
18  
19  
20

### 21 **Harm**

22  
23 This is a non-interventional, non-invasive, observational study. Therefore, the burden on the  
24 participants is minimal. Participant contributions for time spent filling out questionnaires,  
25 installing applications, and communication costs for data transmission will be explained in  
26 writing and verbally in the consent explanation. Consent will be fully explained before  
27 enrolment, and participants can withdraw even while the questionnaire is being filled out.  
28  
29  
30  
31  
32  
33  
34  
35  
36  
37

### 38 **Statistical analysis**

39  
40 The primary purpose is to obtain a database for descriptive research on the actual status of  
41 irAEs, focusing on symptom-related adverse events in patients with cancer receiving  
42 regimens that include ICIs. Furthermore, we aim to determine the incidence of symptom-  
43 related adverse events at each time point in an environment where ePRO-based adverse event  
44 monitoring is conducted in daily practice. Point estimates and 95% confidence intervals of  
45 the incidence of each adverse event at each time point by cancer type and regimen will be  
46 estimated. The treatment of missing values will not be specified in advance. In addition, we  
47 will examine the association between symptom-related adverse events and the extent of  
48  
49  
50  
51  
52  
53  
54  
55  
56  
57  
58  
59  
60

1  
2  
3 pharmacist actions and summarise the ePRO completion rate using descriptive statistics as  
4  
5 the reality of pharmacist actions for PRO-CTCAEs.  
6  
7  
8  
9

## 10 **ETHICS AND DISSEMINATION**

### 11 **Research ethical approval**

12  
13  
14 This research will be conducted per the Declaration of Helsinki, the Ethical Guidelines for  
15  
16 Life Science and Medical Research Involving Human Subjects issued by the Ministry of  
17  
18 Education, Culture, Sports, Science and Technology and the Ministry of Health, Labor and  
19  
20 Welfare, and the revised Personal Information Protection Law. The protocol was approved by  
21  
22 the Ethics Committee of Tokyo Medical University Hospital (approval ID T2021-0180) on  
23  
24 October 15, 2021. The version of the protocol became 1.1 in March 2022. The protocol has  
25  
26 been reviewed by the Institutional Review Boards of the following research centres. Juntendo  
27  
28 University Nerima Hospital, JR Tokyo General Hospital, Nippon Medical School Hospital,  
29  
30 Kyorin University Hospital, Teine Keijinkai Hospital, Nihon University Itabashi Hospital,  
31  
32 University of Miyazaki Hospital and Japanese Red Cross Tokushima Hospital.  
33  
34  
35  
36  
37  
38  
39

### 40 **Consent**

41  
42 The study pharmacist and/or the oncologist will give the patients an informed consent form  
43  
44 and explain the details of the study before enrolment. The participant's request to withdraw  
45  
46 consent during or after the study will be accepted without any disadvantage.  
47  
48  
49

### 50 **Access to data**

51  
52 The study pharmacist and/or the oncologist may use the EDC to review only case data  
53  
54 collected at their site. In addition, only the data manager at the data centre has access to the  
55  
56 case data entered from each research site through the EDC.  
57  
58  
59  
60

## **Confidentiality**

Three types of personal information will be used in this study: medical record number, date of birth, and initials, which are the minimum required for identification and inquiry of the participant. In addition, the participant's medical history and social background, which fall under the category of personal information requiring special consideration, will be collected.

The date of birth will be collected in EDC for age calculation. Participant IDs and initials will be used only in the correspondence table for each institution; this correspondence table will not be provided to anyone other than the respective institutions. Sensitive personal information will be collected in the EDC for use as the study's participant background.

The following measures will be taken to minimise the risk of information leakage when using personal information in this study. First, all data obtained will be used only for the stated purpose. EDC and ePRO systems that comply with the respective laws and regulations will be used. Second, each research institute will create its correspondence table, which will not be shared with other third-party institutions. Third, results will be analysed and reported in a non-personally identifiable format. Fourth, in other respects, the Declaration of Helsinki, the Act on the Protection of Personal Information, and the 'Ethical Guidelines for Life Sciences and Medical Research Involving Human Subjects' will be followed.

## **Dissemination policy**

The results of this study will be presented at major domestic and international conferences and published in English.

## **DISCUSSION**

1  
2  
3 This study aims to obtain a database for descriptive research on the status of irAEs,  
4 focusing on symptom-related adverse events. It is the first multicentre collaborative study in  
5 Japan. The profile of adverse events associated with ICIs differs from that of conventional  
6 cancer drugs. Their use has diversified from monotherapy to combination with cytotoxic  
7 regimens; management methods are not yet established. Furthermore, few studies presently  
8 use PRO-CTCAE to evaluate irAEs with ICIs. Therefore, this study will provide information  
9 on symptom-related adverse events for ICI-containing regimens in Japan, which is not fully  
10 available during the clinical trials in which adverse events were assessed only by ClinRO.  
11  
12  
13  
14  
15  
16  
17  
18  
19  
20

21 This study's database will be used to estimate the cumulative incidence of symptom-  
22 related adverse events at 3, 6, 9, and 12 months, with 2 and 3 of the PRO-CTCAE response  
23 options (from none to 0, 1, 2, 3, and 4) as onset events by carcinoma and regimen. In  
24 addition, we are considering estimating the duration of each symptom-related adverse event  
25 by defining the worsening of an adverse event from baseline as an emergence event and the  
26 duration from the emergence of the adverse event to the return to baseline as the duration of a  
27 symptom-related adverse event. As mentioned earlier, there are still many unknowns  
28 regarding the occurrence of irAEs; this study's database may provide information on trends  
29 in the occurrence of irAEs by carcinoma and regimen. We are also considering summarising  
30 the records of ePRO confirmations with descriptive statistics and examining the association  
31 between symptom-related adverse events and the degree of pharmacist action (response  
32 options) as the reality of pharmacist action for PRO-CTCAEs. This item could be more  
33 clinically relevant, leading to early detection and treatment of irAEs through pharmacist  
34 action using the PRO-CTCAE. This could shorten the duration of treatment for irAEs, avoid  
35 serious events, and allow cancer treatment progression, demonstrating the pharmacist's  
36 professional ability and providing valuable feedback to patients and the medical community.  
37  
38  
39  
40  
41  
42  
43  
44  
45  
46  
47  
48  
49  
50  
51  
52  
53  
54  
55  
56  
57  
58  
59  
60



1  
2  
3 The study protocol has some limitations. First, the study is a hypothetical,  
4 unconventional, observational study, and it does not include patients with all cancer types for  
5 which ICIs can be administered. Additionally, the number of patients was not determined by  
6 statistical methods but rather based on the number of patients at participating sites. Therefore,  
7 there are limitations with respect to generalizability. Second, the items of symptom-related  
8 adverse events in this study were determined by reviewing previous literature and Japanese  
9 drug package inserts and discussed by four oncology pharmacists. Therefore, it is impossible  
10 to collect information on the occurrence of other symptoms. Third, participants with  
11 cognitive impairments or psychiatric disorders and those unable to operate a smartphone or  
12 tablet are excluded from participation in this study. Most of the excluded patients are likely to  
13 be older adults. Patients with cancer in real-world practice are often older adults; age  
14 differences may be a barrier between the study and real-world practice.

15  
16  
17  
18  
19  
20  
21  
22  
23  
24  
25  
26  
27  
28  
29  
30  
31 The RESPECT trial may provide critical information for future treatment with ICIs in  
32 clinical practice by providing information on symptom-related adverse events that have not  
33 been adequately obtained during the clinical trials conducted before approval. In fact, the  
34 adverse event assessments from our registry will not only provide the “worst grade during  
35 time period” used in general cancer clinical trials, but also provide cumulative incidence rates  
36 and changes over time by ICIs, their regimens, or by cancer type, based on temporal changes  
37 such as onset and resolution of adverse event ratings.

### 48 49 **Study status**

50  
51 The study began enrolling patients in December 2021. The target enrolment is 260; as of  
52 October 2022, 141 participants have been enrolled. Enrollment is scheduled to end on June  
53 30, 2023. The research is to be conducted from October 15, 2021, to March 31, 2028.

## Acknowledgements

The authors thank, in advance, all the participants, investigators, and institutions that will be involved in this study.

## Authors' contributions

AY contributed to the study conception and is the principal investigator. KA, TH, AT, DH, TF, TK, MS, and TY participated in the study's design. TF, TK, and TY played a primary role in designing the data management approach. TK and TY played a primary role in designing statistical analysis. TM, TM, TK, and TY will conduct data analysis and interpretation. KM, AT, TH, HA, YS, AK, MM, SO, CI, MF, NS, YT, MI, NM, TK, SH, AS, YK, GA, YK, MO, TN, MO, TY, NM, AS, RI, KW, KI, ST, AU, TY, SW, and DT have carried out recruitment and collected the data. All authors have read and approved the final manuscript and meet the criteria for authorship as established by the International Committee of Medical Journals Editors.

## Funding

This work was supported by the Ministry of Health, Labour and Welfare (MHLW), the Grant-in-Aid for Scientific Research on Administrative Measures, 'Research Project for ICT Infrastructure Development and Artificial Intelligence Implementation for Clinical Research', Evaluation of the efficacy of the Japanese version of PRO-CTCAE in actual clinical practice and in clinical trials, grant number [20AC1002]. No funding has been received from specific companies or organisations other than those listed above.

## Competing interests statement

None declared.

## **Patient and public involvement**

PPI was conducted per the Patient and Public Involvement (PPI) Guidebook of the National Institute of Biomedical Research and Innovation (NIBIO)[24], Japan, at the research planning stage. The following two patient groups were asked to cooperate in participation: NPO Lung Cancer Patients Association One Step and General Incorporated Association Esophageal Cancer Survivor's Sharing.

## **Patient consent for publication**

Consent was obtained directly from participants.

## **Provenance and peer review**

Not commissioned; externally peer-reviewed.

## **Open access**

This is an open-access article distributed per the Creative Commons Attribution-Non-Commercial (CC BY-NC 4.0) license, which permits others to distribute, remix, adapt, build upon this work non-commercially, and license their derivative works on different terms, provided the original work is properly cited, appropriate credit is given, any changes made indicated, and the use is non-commercial. See <http://creativecommons.org/licenses/by-nc/4.0/>.

## **Data Availability Statement**

The datasets used and analysed during the current study are available from the corresponding author on reasonable request.

## REFERENCES

1. Fitzmaurice C, Abate D, Abbasi N, et al. Global, regional, and national cancer incidence, mortality, years of life lost, years lived with disability, and disability-adjusted life-years for 29 cancer groups, 1990 to 2017: a systematic analysis for the global burden of disease study. *JAMA Oncol* 2019;5:1749–68.
2. Hori M, Matsuda T, Shibata A, et al. Cancer incidence and incidence rates in Japan in 2009: a study of 32 population-based cancer registries for the Monitoring of Cancer Incidence in Japan (MCIJ) project. *Jpn J Clin Oncol* 2015;45:884–91.
3. Postow MA, Callahan MK, Wolchok JD. Immune checkpoint blockade in cancer therapy. *J Clin Oncol* 2015;33:1974–82.
4. Lemery S, Keegan P, Pazdur R. First FDA approval agnostic of cancer site - when a biomarker defines the indication. *N Engl J Med* 2017;377:1409–12.
5. Postow MA, Sidlow R, Hellmann MD. Immune-related adverse events associated with immune checkpoint blockade. *N Engl J Med* 2018;378:158–68.
6. Weber JS, Kähler KC, Hauschild A. Management of immune-related adverse events and kinetics of response with ipilimumab. *J Clin Oncol* 2012;30:2691–7.
7. Weber JS, Hodi FS, Wolchok JD, et al. Safety profile of nivolumab monotherapy: a pooled analysis of patients with advanced melanoma. *J Clin Oncol* 2017;35:785–92.
8. Topalian SL, Drake CG, Pardoll DM. Immune checkpoint blockade: a common denominator approach to cancer therapy. *Cancer Cell* 2015;27:450–61.
9. Japanese Society of Clinical Oncology. Guidelines for Cancer Immunotherapy, 2nd Edition. 2019
10. Brahmer JR, Lacchetti C, Schneider BJ, et al. Management of immune-related adverse events in patients treated with immune checkpoint inhibitor therapy:

- 1  
2  
3 American Society of Clinical Oncology Clinical Practice Guideline. *J Clin*  
4  
5 *Oncol* 2018;36:1714–68.  
6  
7  
8 11. Food and Drug Administration, Guidance for industry: patient-reported outcome  
9  
10 measures: use in medical product development to support labeling claims. *Health*  
11  
12 *Qual Life Outcomes* 2006;4:79.  
13  
14  
15 12. Basch E, Jia X, Heller G, et al. Adverse symptom event reporting by patients vs  
16  
17 clinicians: relationships with clinical outcomes. *J Natl Cancer Inst* 2009;101:1624–32.  
18  
19  
20 13. Basch E, Deal AM, Dueck AC, et al. Overall survival results of a trial assessing  
21  
22 patient-reported outcomes for symptom monitoring during routine cancer  
23  
24 treatment. *JAMA* 2017;318:197–8.  
25  
26  
27 14. Tolstrup LK, Bastholt L, Dieperink KB, et al. The use of patient-reported outcomes to  
28  
29 detect adverse events in metastatic melanoma patients receiving immunotherapy: a  
30  
31 randomized controlled pilot trial. *J Patient Rep Outcomes* 2020;4:88.  
32  
33  
34 15. Tolstrup LK, Bastholt L, Zwisler AD, et al. Selection of patient reported outcomes  
35  
36 questions reflecting symptoms for patients with metastatic melanoma receiving  
37  
38 immunotherapy. *J Patient Rep Outcomes* 2019;3:19.  
39  
40  
41 16. Mamoor M, Postow MA, Lavery JA, et al. Quality of life in long-term survivors of  
42  
43 advanced melanoma treated with checkpoint inhibitors. *J Immunother*  
44  
45 *Cancer* 2020;8:e000260.  
46  
47  
48 17. Steffen McLouth LE, Lycan TW, Levine BJ, et al. Patient-reported outcomes from  
49  
50 patients receiving immunotherapy or chemoimmunotherapy for metastatic non-small-  
51  
52 cell lung cancer in clinical practice. *Clin Lung Cancer* 2020;21:255–263.e4.  
53  
54  
55 18. Makio I, Yusuke M et al. Function of and need for a pharmaceutical outpatient clinic  
56  
57 run by oncology pharmacy specialists. *Japanese Journal of Pharmaceutical Health*  
58  
59 *Care and Sciences*. 2015;41:254–65.  
60

- 1  
2  
3 19. Yoshitaka S, Sachiko H et al. Survey of the efficacy of long-term and successive  
4 pharmaceutical care in outpatient chemotherapy by oncology pharmacy specialists.  
5  
6 Journal of the Pharmaceutical Society of Japan, 2018;138;1409–16.  
7  
8  
9  
10 20. Dueck AC, Mendoza TR, Mitchell SA, et al. Validity and reliability of the US  
11 National Cancer Institute's Patient-Reported Outcomes Version of the Common  
12 Terminology Criteria for Adverse Events (PRO-CTCAE). JAMA  
13  
14 Oncol 2015;1:1051–9.  
15  
16  
17  
18 21. Miyaji T, Iioka Y, Kuroda Y, et al. Japanese translation and linguistic validation of  
19 the US National Cancer Institute's Patient-Reported Outcomes version of the  
20 Common Terminology Criteria for Adverse Events (PRO-CTCAE). J Patient Rep  
21  
22 Outcomes 2017;1:8.  
23  
24  
25  
26  
27 22. Kawaguchi T, Azuma K, Sano M, et al. The Japanese version of the National Cancer  
28 Institute's patient-reported outcomes version of the common terminology criteria for  
29 adverse events (PRO-CTCAE): psychometric validation and discordance between  
30 clinician and patient assessments of adverse events. J Patient Rep Outcomes 2017;2:2.  
31  
32  
33  
34  
35  
36  
37 23. Abetz L, Coombs JH, Keininger DL, et al. Development of the cancer therapy  
38 satisfaction questionnaire: item generation and content validity testing. Value  
39  
40 Health 2005;8 Suppl 1:S41–53.  
41  
42  
43  
44 24. Japan Agency for Medical Research and Development [online].  
45  
46 <https://www.amed.go.jp/ppi/guidebook.html>. (accessed 15 Jan 2023)  
47  
48  
49  
50  
51  
52  
53  
54  
55  
56  
57  
58  
59  
60

**Table 1.** Study timeline

| Week                                     |      | 0 | 1–11 | 12 |
|------------------------------------------|------|---|------|----|
| Eligibility verification                 | eCRF | ○ |      |    |
| Background                               |      |   |      |    |
| Participant Background                   | eCRF | ○ |      |    |
| Psychosocial background                  | ePRO | ● |      |    |
| ECOG PS                                  | eCRF | ○ |      |    |
| Adverse events                           |      |   |      |    |
| PRO-CTCAE                                | ePRO | ● | ●    | ●  |
| CTCAE v5.0-JCOG                          | eCRF |   |      |    |
| Laboratory data                          |      |   |      |    |
| Clinical laboratory test results         |      |   |      |    |
| Blood biochemistry test                  | eCRF |   |      |    |
| Endocrinological examination             | eCRF |   |      |    |
| Record of the time of the visit          | eCRF |   |      |    |
| Records at the time of ePRO confirmation | eCRF |   |      |    |
| Satisfaction (CTSQ)                      | ePRO |   |      |    |
| A questionnaire on ePRO use              | ePRO |   |      | ●  |
| irAE (Suspected/confirmed)               |      |   |      |    |
| Change of outcome/treatment              |      |   |      |    |

(e)PRO, (electronic) Patient-Reported Outcome; JCOG, Japan Clinical Oncology Group; CTSQ, C  
 ○, Medical Professionals Valuation; ●, Participant assessment.

1  
2  
3  
4  
5  
6  
7  
8  
9  
10  
11  
12  
13  
14  
15  
16  
17  
18  
19  
20  
21  
22  
23  
24  
25  
26  
27  
28  
29  
30  
31  
32  
33  
34  
35  
36  
37  
38  
39  
40  
41  
42  
43  
44  
45  
46  
47  
48  
49  
50  
51  
52  
53  
54  
55  
56  
57  
58  
59  
60

---

|       |    |       |    |       |    |                      |
|-------|----|-------|----|-------|----|----------------------|
| 13–23 | 24 | 25–35 | 36 | 37–47 | 48 | Periodic report form |
|-------|----|-------|----|-------|----|----------------------|

---

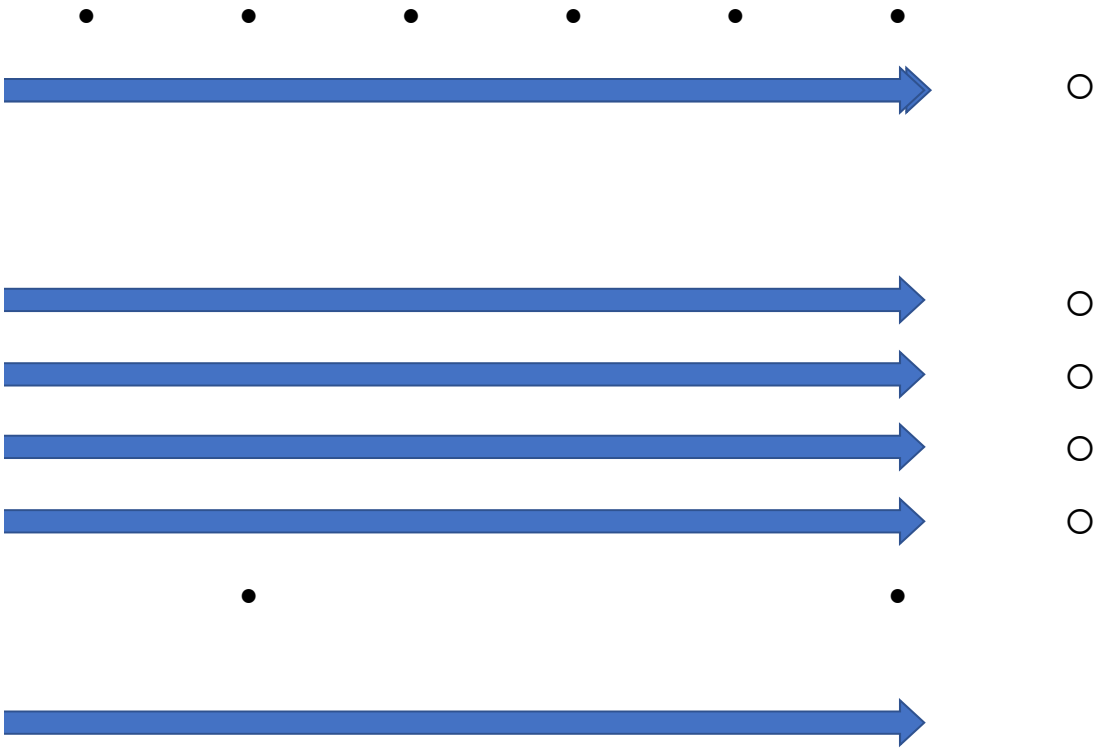


---

Cancer Therapy Satisfaction Questionnaire; irAE, Immune-related adverse events; eCRF, Ele



1  
2  
3  
4  
5  
6  
7  
8  
9  
10  
11  
12  
13  
14  
15  
16  
17  
18  
19  
20  
21  
22  
23  
24  
25  
26  
27  
28  
29  
30  
31  
32  
33  
34  
35  
36  
37  
38  
39  
40  
41  
42  
43  
44  
45  
46  
47  
48  
49  
50  
51  
52  
53  
54  
55  
56  
57  
58  
59  
60

|             |                            |
|-------------|----------------------------|
|             | When                       |
| At any time | terminated or<br>cancelled |

For peer review only

○

○

\_\_\_\_\_  
electronic case report form.

**The RECORD statement – checklist of items, extended from the STROBE statement, that should be reported in observational studies using routinely collected health data.**

|                           | Item No. | STROBE items                                                                                                                                                                               | Location in manuscript where items are reported (page numbers) | RECORD items                                                                                                                                                                                                                                                                                                                                                                                                                                | Location in manuscript where items are reported (page numbers) |
|---------------------------|----------|--------------------------------------------------------------------------------------------------------------------------------------------------------------------------------------------|----------------------------------------------------------------|---------------------------------------------------------------------------------------------------------------------------------------------------------------------------------------------------------------------------------------------------------------------------------------------------------------------------------------------------------------------------------------------------------------------------------------------|----------------------------------------------------------------|
| <b>Title and abstract</b> |          |                                                                                                                                                                                            |                                                                |                                                                                                                                                                                                                                                                                                                                                                                                                                             |                                                                |
|                           | 1        | (a) Indicate the study's design with a commonly used term in the title or the abstract (b) Provide in the abstract an informative and balanced summary of what was done and what was found |                                                                | RECORD 1.1: The type of data used should be specified in the title or abstract. When possible, the name of the databases used should be included.<br><br>RECORD 1.2: If applicable, the geographic region and timeframe within which the study took place should be reported in the title or abstract.<br><br>RECORD 1.3: If linkage between databases was conducted for the study, this should be clearly stated in the title or abstract. | (1)                                                            |
| <b>Introduction</b>       |          |                                                                                                                                                                                            |                                                                |                                                                                                                                                                                                                                                                                                                                                                                                                                             |                                                                |
| Background rationale      | 2        | Explain the scientific background and rationale for the investigation being reported                                                                                                       | (6-8)                                                          |                                                                                                                                                                                                                                                                                                                                                                                                                                             |                                                                |
| Objectives                | 3        | State specific objectives, including any prespecified hypotheses                                                                                                                           | (9)                                                            |                                                                                                                                                                                                                                                                                                                                                                                                                                             |                                                                |
| <b>Methods</b>            |          |                                                                                                                                                                                            |                                                                |                                                                                                                                                                                                                                                                                                                                                                                                                                             |                                                                |
| Study Design              | 4        | Present key elements of study design early in the paper                                                                                                                                    | (9)                                                            |                                                                                                                                                                                                                                                                                                                                                                                                                                             |                                                                |

|              |   |                                                                                                                                                                                                                                                                                                                                                                                                                                                                                                                                                                                                                                                                                                                              |         |                                                                                                                                                                                                                                                                                                                                                                                                                                                                                                                                                                                                                                                                                                      |         |
|--------------|---|------------------------------------------------------------------------------------------------------------------------------------------------------------------------------------------------------------------------------------------------------------------------------------------------------------------------------------------------------------------------------------------------------------------------------------------------------------------------------------------------------------------------------------------------------------------------------------------------------------------------------------------------------------------------------------------------------------------------------|---------|------------------------------------------------------------------------------------------------------------------------------------------------------------------------------------------------------------------------------------------------------------------------------------------------------------------------------------------------------------------------------------------------------------------------------------------------------------------------------------------------------------------------------------------------------------------------------------------------------------------------------------------------------------------------------------------------------|---------|
| Setting      | 5 | Describe the setting, locations, and relevant dates, including periods of recruitment, exposure, follow-up, and data collection                                                                                                                                                                                                                                                                                                                                                                                                                                                                                                                                                                                              | (10-11) |                                                                                                                                                                                                                                                                                                                                                                                                                                                                                                                                                                                                                                                                                                      |         |
| Participants | 6 | <p>(a) <i>Cohort study</i> - Give the eligibility criteria, and the sources and methods of selection of participants. Describe methods of follow-up</p> <p><i>Case-control study</i> - Give the eligibility criteria, and the sources and methods of case ascertainment and control selection. Give the rationale for the choice of cases and controls</p> <p><i>Cross-sectional study</i> - Give the eligibility criteria, and the sources and methods of selection of participants</p> <p>(b) <i>Cohort study</i> - For matched studies, give matching criteria and number of exposed and unexposed</p> <p><i>Case-control study</i> - For matched studies, give matching criteria and the number of controls per case</p> |         | <p>RECORD 6.1: The methods of study population selection (such as codes or algorithms used to identify subjects) should be listed in detail. If this is not possible, an explanation should be provided.</p> <p>RECORD 6.2: Any validation studies of the codes or algorithms used to select the population should be referenced. If validation was conducted for this study and not published elsewhere, detailed methods and results should be provided.</p> <p>RECORD 6.3: If the study involved linkage of databases, consider use of a flow diagram or other graphical display to demonstrate the data linkage process, including the number of individuals with linked data at each stage.</p> | (10-11) |
| Variables    | 7 | Clearly define all outcomes, exposures, predictors, potential confounders, and effect modifiers. Give diagnostic criteria, if applicable.                                                                                                                                                                                                                                                                                                                                                                                                                                                                                                                                                                                    |         | RECORD 7.1: A complete list of codes and algorithms used to classify exposures, outcomes, confounders, and effect modifiers should be provided. If these cannot be reported, an explanation should be provided.                                                                                                                                                                                                                                                                                                                                                                                                                                                                                      | (17-18) |

|                                        |                              |    |                                                                                                                                                                                      |         |  |  |
|----------------------------------------|------------------------------|----|--------------------------------------------------------------------------------------------------------------------------------------------------------------------------------------|---------|--|--|
| 1<br>2<br>3<br>4<br>5<br>6<br>7        | Data sources/<br>measurement | 8  | For each variable of interest, give sources of data and details of methods of assessment (measurement). Describe comparability of assessment methods if there is more than one group | (18)    |  |  |
| 8<br>9                                 | Bias                         | 9  | Describe any efforts to address potential sources of bias                                                                                                                            | (18-19) |  |  |
| 10<br>11<br>12<br>13                   | Study size                   | 10 | Explain how the study size was arrived at                                                                                                                                            | (17)    |  |  |
| 14<br>15<br>16<br>17<br>18<br>19<br>20 | Quantitative variables       | 11 | Explain how quantitative variables were handled in the analyses. If applicable, describe which groupings were chosen, and why                                                        | (17-18) |  |  |

21  
22  
23  
24  
25  
26  
27  
28  
29  
30  
31  
32  
33  
34  
35  
36  
37  
38  
39  
40  
41  
42  
43  
44  
45  
46  
47

|                                                                                                                                                                                       |           |                                                                                                                                                                                                                                                                                                                                                                                                                                                                                                                                                           |             |                                                                                                                                                              |            |
|---------------------------------------------------------------------------------------------------------------------------------------------------------------------------------------|-----------|-----------------------------------------------------------------------------------------------------------------------------------------------------------------------------------------------------------------------------------------------------------------------------------------------------------------------------------------------------------------------------------------------------------------------------------------------------------------------------------------------------------------------------------------------------------|-------------|--------------------------------------------------------------------------------------------------------------------------------------------------------------|------------|
| <p>1<br/>2<br/>3<br/>4<br/>5<br/>6<br/>7<br/>8<br/>9<br/>10<br/>11<br/>12<br/>13<br/>14<br/>15<br/>16<br/>17<br/>18<br/>19<br/>20<br/>21<br/>22<br/>23</p> <p>Statistical methods</p> | <p>12</p> | <p>(a) Describe all statistical methods, including those used to control for confounding (b) Describe any methods used to examine subgroups and interactions (c) Explain how missing data were addressed (d) <i>Cohort study</i> - If applicable, explain how loss to follow-up was addressed <i>Case-control study</i> - If applicable, explain how matching of cases and controls was addressed <i>Cross-sectional study</i> - If applicable, describe analytical methods taking account of sampling strategy (e) Describe any sensitivity analyses</p> | <p>(19)</p> |                                                                                                                                                              |            |
| <p>24<br/>25<br/>26<br/>27<br/>28<br/>29<br/>30<br/>31</p> <p>Data access and cleaning methods</p>                                                                                    |           | <p>..</p>                                                                                                                                                                                                                                                                                                                                                                                                                                                                                                                                                 |             | <p>RECORD 12.1: Authors should describe the extent to which the investigators had access to the database population used to create the study population.</p> | <p>N/A</p> |
|                                                                                                                                                                                       |           |                                                                                                                                                                                                                                                                                                                                                                                                                                                                                                                                                           |             | <p>RECORD 12.2: Authors should provide information on the data cleaning methods used in the study.</p>                                                       | <p>N/A</p> |

|                                                                                        |                  |    |                                                                                                                                                                                                                                                                                                                                              |                                                                                                                                                                                                                                                                                                                    |      |
|----------------------------------------------------------------------------------------|------------------|----|----------------------------------------------------------------------------------------------------------------------------------------------------------------------------------------------------------------------------------------------------------------------------------------------------------------------------------------------|--------------------------------------------------------------------------------------------------------------------------------------------------------------------------------------------------------------------------------------------------------------------------------------------------------------------|------|
| 1<br>2<br>3<br>4<br>5<br>6<br>7<br>8                                                   | Linkage          | .. |                                                                                                                                                                                                                                                                                                                                              | RECORD 12.3: State whether the study included person-level, institutional-level, or other data linkage across two or more databases. The methods of linkage and methods of linkage quality evaluation should be provided.                                                                                          | (15) |
| 9                                                                                      | <b>Results</b>   |    |                                                                                                                                                                                                                                                                                                                                              |                                                                                                                                                                                                                                                                                                                    |      |
| 10<br>11<br>12<br>13<br>14<br>15<br>16<br>17<br>18<br>19<br>20<br>21<br>22<br>23       | Participants     | 13 | (a) Report the numbers of individuals at each stage of the study ( <i>e.g.</i> , numbers potentially eligible, examined for eligibility, confirmed eligible, included in the study, completing follow-up, and analysed)<br>(b) Give reasons for nonparticipation at each stage.<br>(c) Consider use of a flow diagram                        | RECORD 13.1: Describe in detail the selection of the persons included in the study ( <i>i.e.</i> , study population selection) including filtering based on data quality, data availability and linkage. The selection of included persons can be described in the text and/or by means of the study flow diagram. | N/A  |
| 24<br>25<br>26<br>27<br>28<br>29<br>30<br>31<br>32<br>33<br>34<br>35<br>36<br>37<br>38 | Descriptive data | 14 | (a) Give characteristics of study participants ( <i>e.g.</i> , demographic, clinical, social) and information on exposures and potential confounders<br>(b) Indicate the number of participants with missing data for each variable of interest (c) <i>Cohort study</i> - summarise follow-up time ( <i>e.g.</i> , average and total amount) | N/A                                                                                                                                                                                                                                                                                                                |      |

|                   |    |                                                                                                                                                                                                                                                                                                                                                                                                          |         |  |  |
|-------------------|----|----------------------------------------------------------------------------------------------------------------------------------------------------------------------------------------------------------------------------------------------------------------------------------------------------------------------------------------------------------------------------------------------------------|---------|--|--|
| Outcome data      | 15 | <i>Cohort study</i> - Report numbers of outcome events or summary measures over time<br><i>Case-control study</i> - Report numbers in each exposure                                                                                                                                                                                                                                                      | N/A     |  |  |
|                   |    | category, or summary measures of exposure<br><i>Cross-sectional study</i> - Report numbers of outcome events or summary measures                                                                                                                                                                                                                                                                         |         |  |  |
| Main results      | 16 | (a) Give unadjusted estimates and, if applicable, confounderadjusted estimates and their precision (e.g., 95% confidence interval). Make clear which confounders were adjusted for and why they were included (b) Report category boundaries when continuous variables were categorized (c) If relevant, consider translating estimates of relative risk into absolute risk for a meaningful time period | N/A     |  |  |
| Other analyses    | 17 | Report other analyses done— e.g., analyses of subgroups and interactions, and sensitivity analyses                                                                                                                                                                                                                                                                                                       | N/A     |  |  |
| <b>Discussion</b> |    |                                                                                                                                                                                                                                                                                                                                                                                                          |         |  |  |
| Key results       | 18 | Summarise key results with reference to study objectives                                                                                                                                                                                                                                                                                                                                                 | (22-24) |  |  |

|                                                    |                                                           |    |                                                                                                                                                                            |         |                                                                                                                                                                                                                                                                                                          |      |
|----------------------------------------------------|-----------------------------------------------------------|----|----------------------------------------------------------------------------------------------------------------------------------------------------------------------------|---------|----------------------------------------------------------------------------------------------------------------------------------------------------------------------------------------------------------------------------------------------------------------------------------------------------------|------|
| 1<br>2<br>3<br>4<br>5<br>6<br>7<br>8<br>9<br>10    | Limitations                                               | 19 | Discuss limitations of the study, taking into account sources of potential bias or imprecision. Discuss both direction and magnitude of any potential bias                 |         | RECORD 19.1: Discuss the implications of using data that were not created or collected to answer the specific research question(s). Include discussion of misclassification bias, unmeasured confounding, missing data, and changing eligibility over time, as they pertain to the study being reported. | N/A  |
| 11<br>12<br>13<br>14<br>15<br>16<br>17<br>18<br>19 | Interpretation                                            | 20 | Give a cautious overall interpretation of results considering objectives, limitations, multiplicity of analyses, results from similar studies, and other relevant evidence | (23-24) |                                                                                                                                                                                                                                                                                                          |      |
| 20<br>21<br>22<br>23                               | Generalisability                                          | 21 | Discuss the generalisability (external validity) of the study results                                                                                                      | (24)    |                                                                                                                                                                                                                                                                                                          |      |
| 24                                                 | <b>Other Information</b>                                  |    |                                                                                                                                                                            |         |                                                                                                                                                                                                                                                                                                          |      |
| 25<br>26<br>27<br>28<br>29<br>30                   | Funding                                                   | 22 | Give the source of funding and the role of the funders for the present study and, if applicable, for the original study on which the present article is based              | (26)    |                                                                                                                                                                                                                                                                                                          |      |
| 31<br>32<br>33<br>34<br>35<br>36<br>37             | Accessibility of protocol, raw data, and programming code |    | ..                                                                                                                                                                         |         | RECORD 22.1: Authors should provide information on how to access any supplemental information such as the study protocol, raw data, or programming code.                                                                                                                                                 | (16) |

38  
39 \*Reference: Benchimol EI, Smeeth L, Guttman A, Harron K, Moher D, Petersen I, Sørensen HT, von Elm E, Langan SM, the RECORD Working  
40 Committee. The REporting of studies Conducted using Observational Routinely-collected health Data (RECORD) Statement. *PLoS Medicine* 2015;  
41 in press.  
42  
43



\*Checklist is protected under Creative Commons Attribution ([CC BY](#)) license.

1  
2  
3  
4  
5  
6  
7  
8  
9  
10  
11  
12  
13  
14  
15  
16  
17  
18  
19  
20  
21  
22  
23  
24  
25  
26  
27  
28  
29  
30  
31  
32  
33  
34  
35  
36  
37  
38  
39  
40  
41  
42  
43  
44  
45  
46  
47

For peer review only
